# Supplementary material for: A Systematic Approach to Bacterial Phylogeny Using Order Level Sampling and Identification of HGT Using Network Science
Source: MDPI journal article supplement (doi:10.3390/microorganisms8020312), 2020-02-24

Supplementary File1: List of likely Functional inference from dendrograms of putative horizontally-transferred genes in M. infera with unknown functions.

Genes are mostly transferases, Transposase, Hydrolytic enzymes and ABC transporter. The function for six genes is still unknown.

### 1- MESINF\_0559\_1071: AAC(3)-I family aminoglycoside 3-N-acetyltransferase

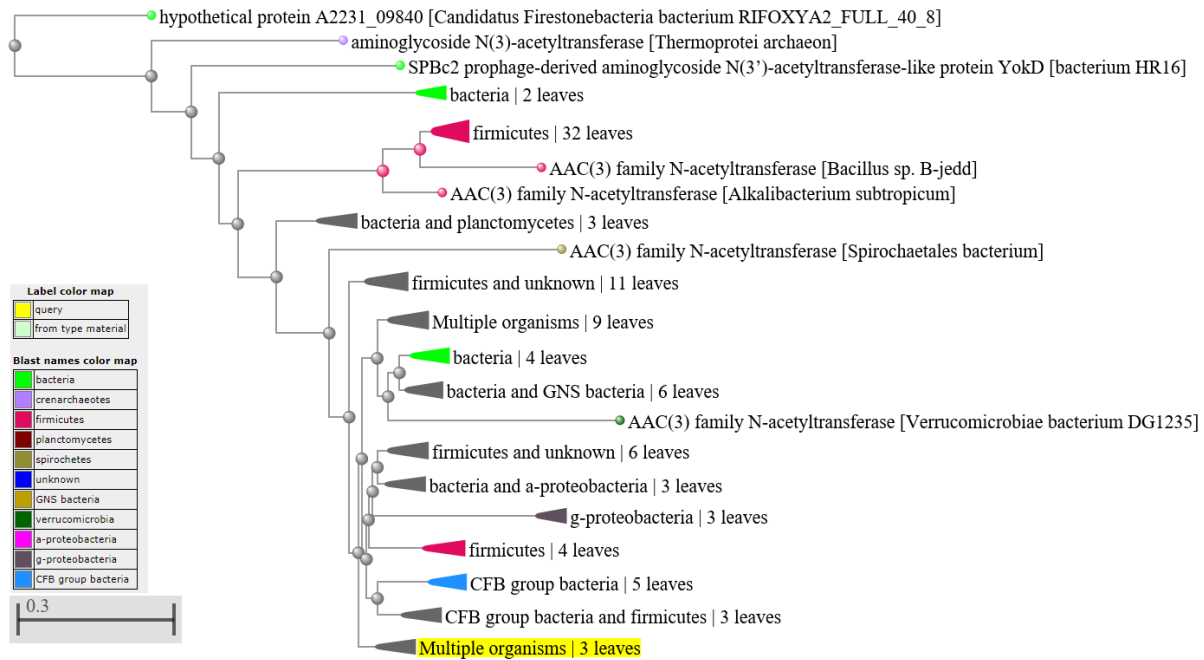

## 2- MESINF\_0559\_2033: Acyl-phosphate glycerol 3-phosphate acyltransferase

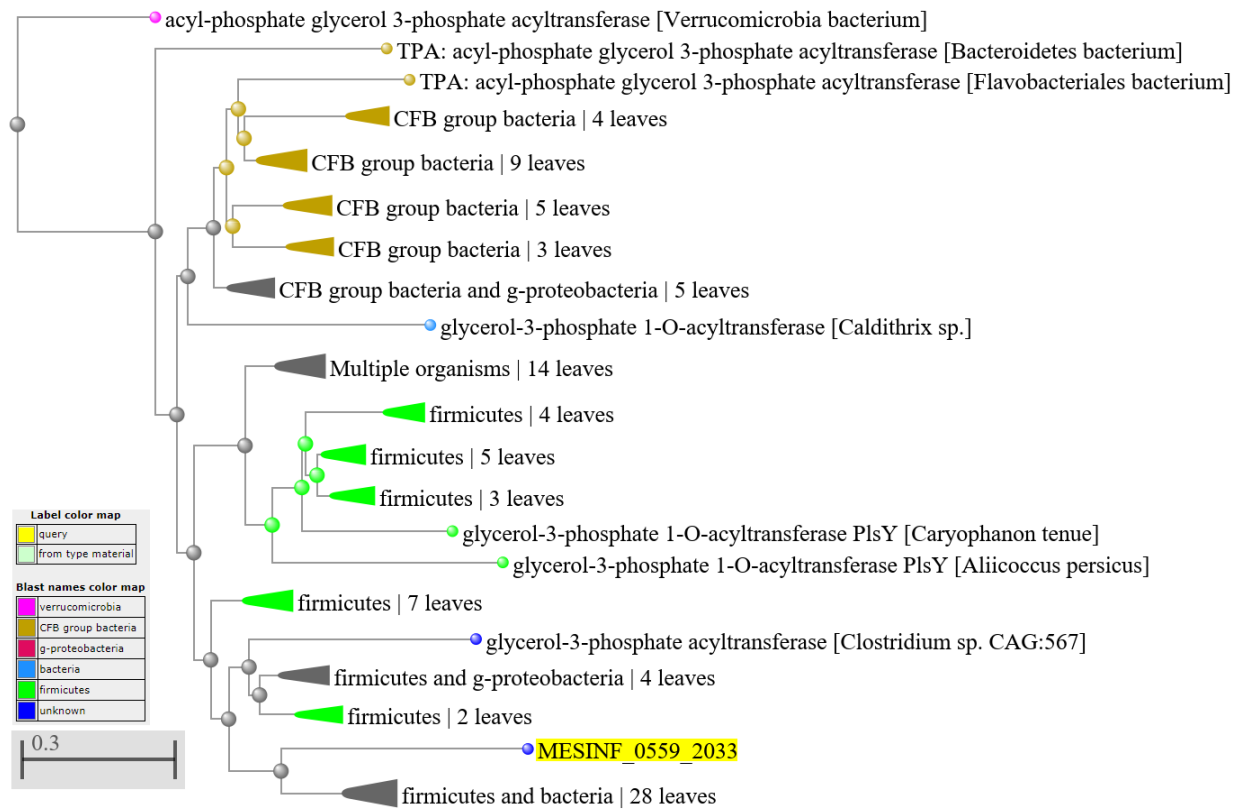

## 3- MESINF\_0559\_2762: class I SAM-dependent methyltransferase

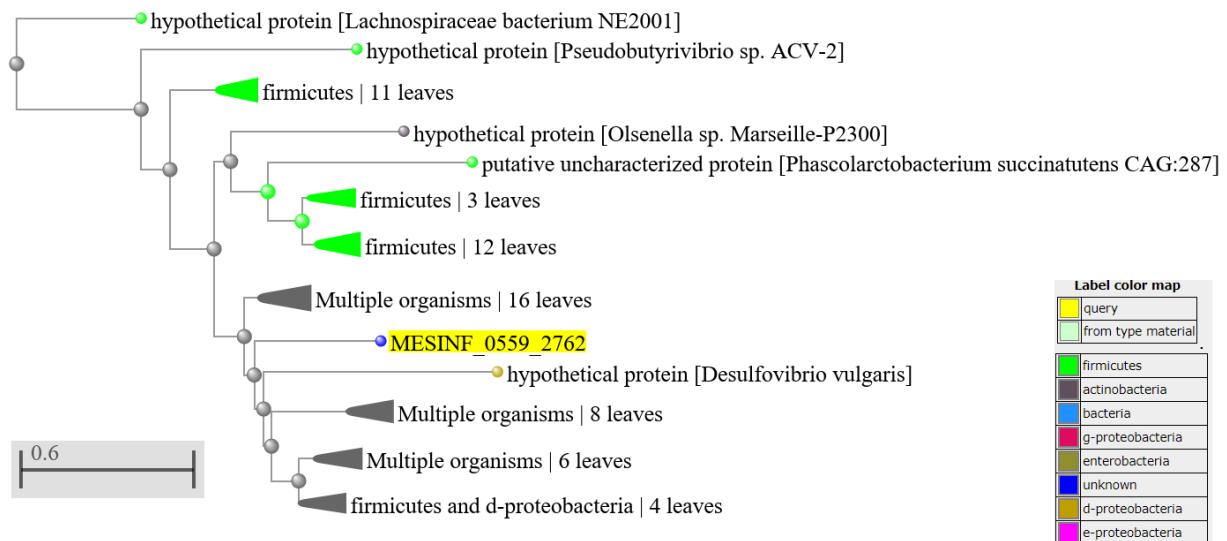

#### 4- MESINF\_0559\_0681: EpsG family protein

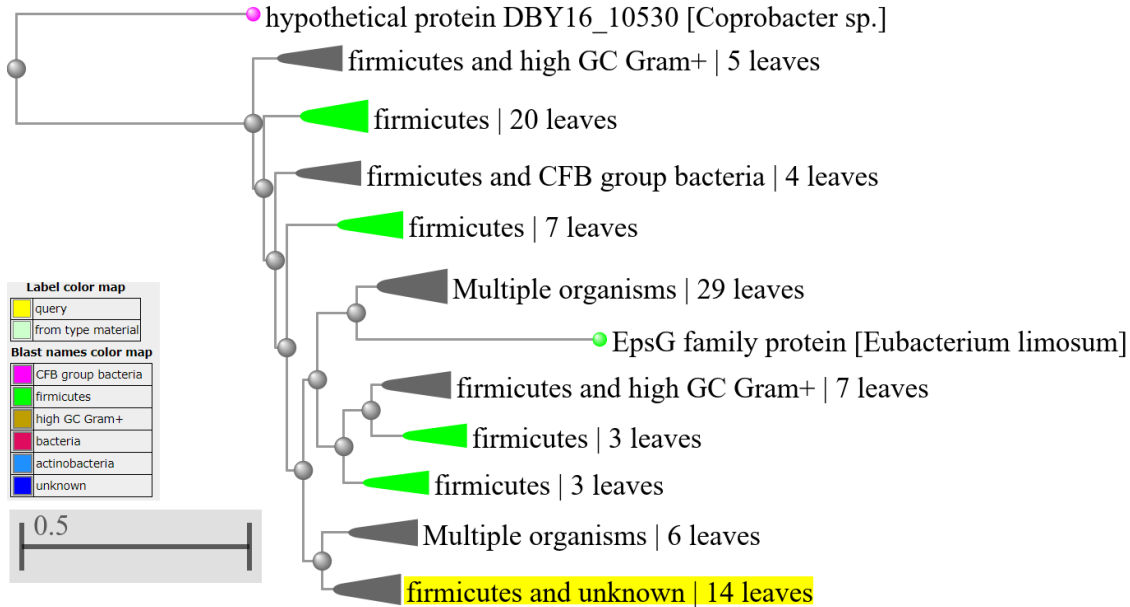

#### 5- MESINF\_0559\_2738: FAD:protein FMN transferase

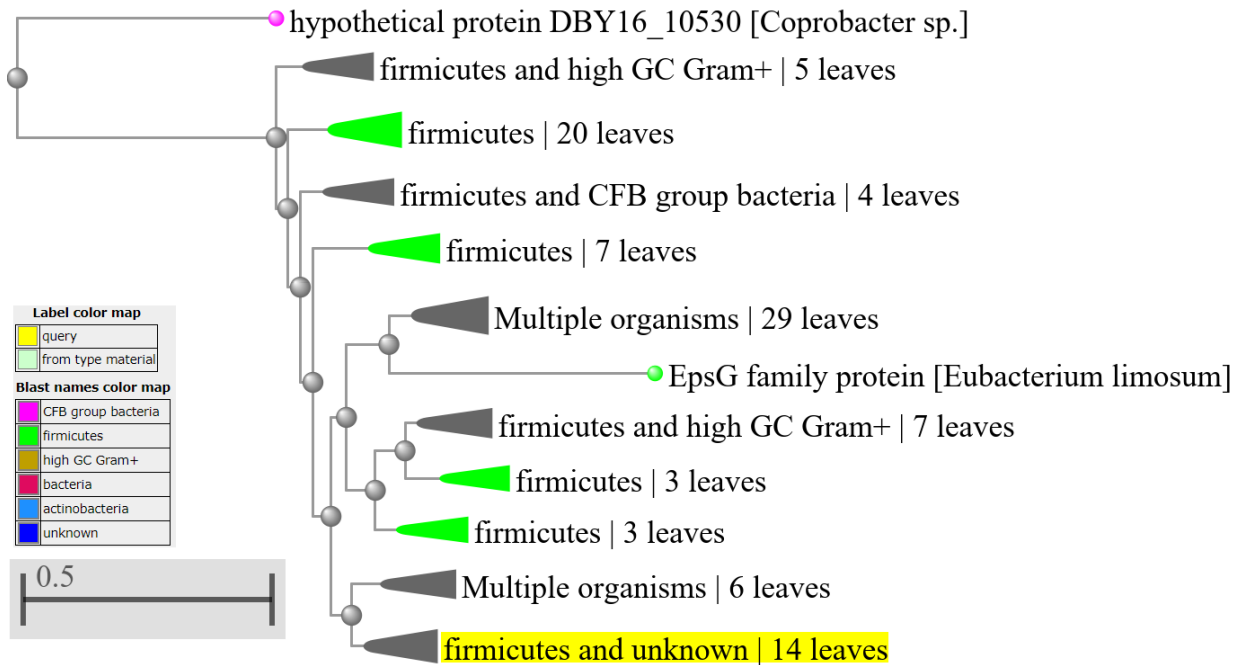

## 6- MESINF\_0559\_0682: glycosyl transferases

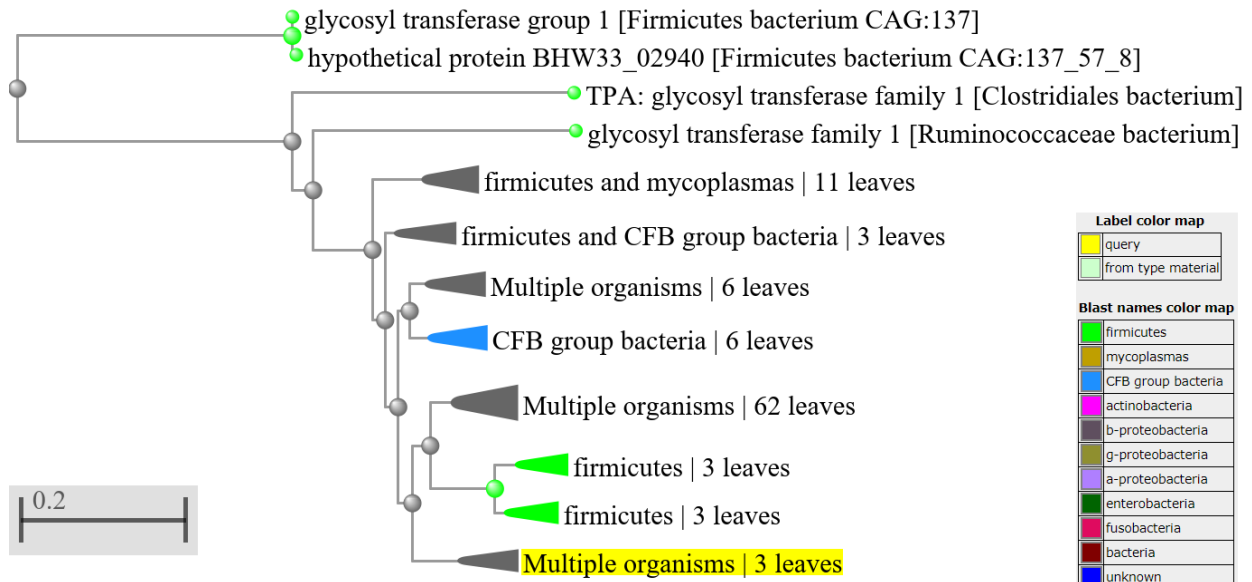

## 7- MESINF\_0559\_1105: glycosyl transferases

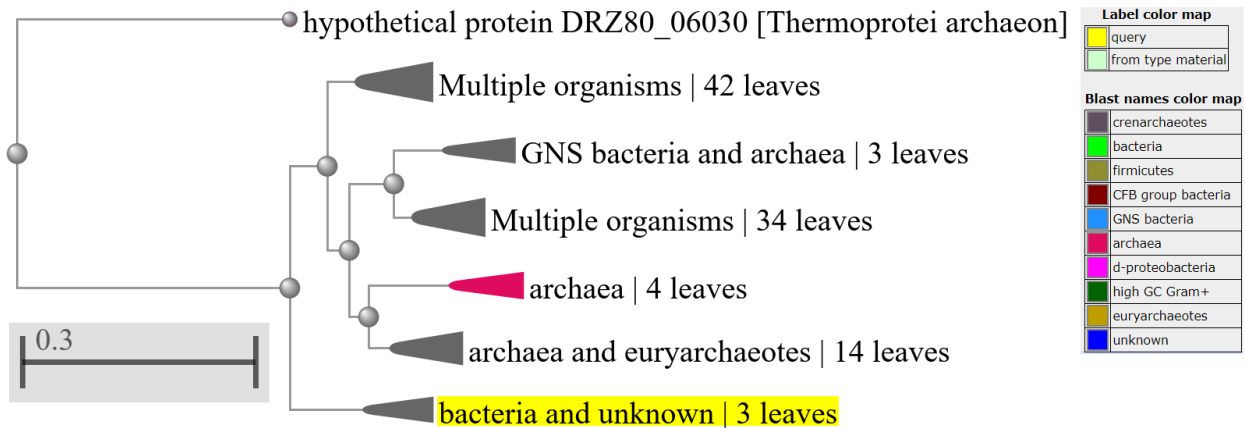

## 8- MESINF\_0559\_0680: glycosyl transferases

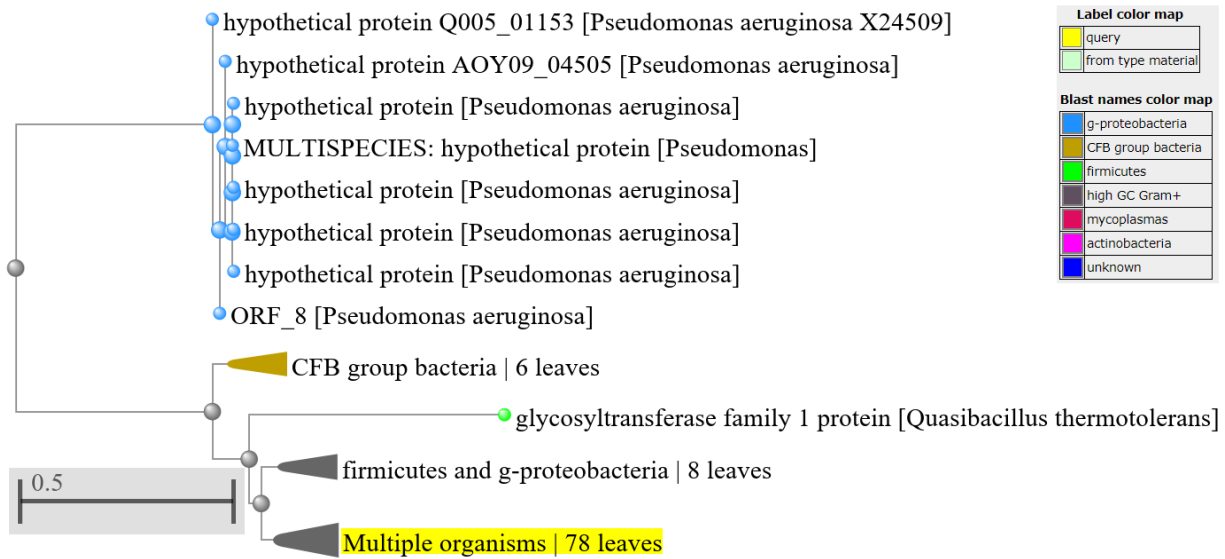

## 9- MESINF\_0559\_0679: glycosyl transferases

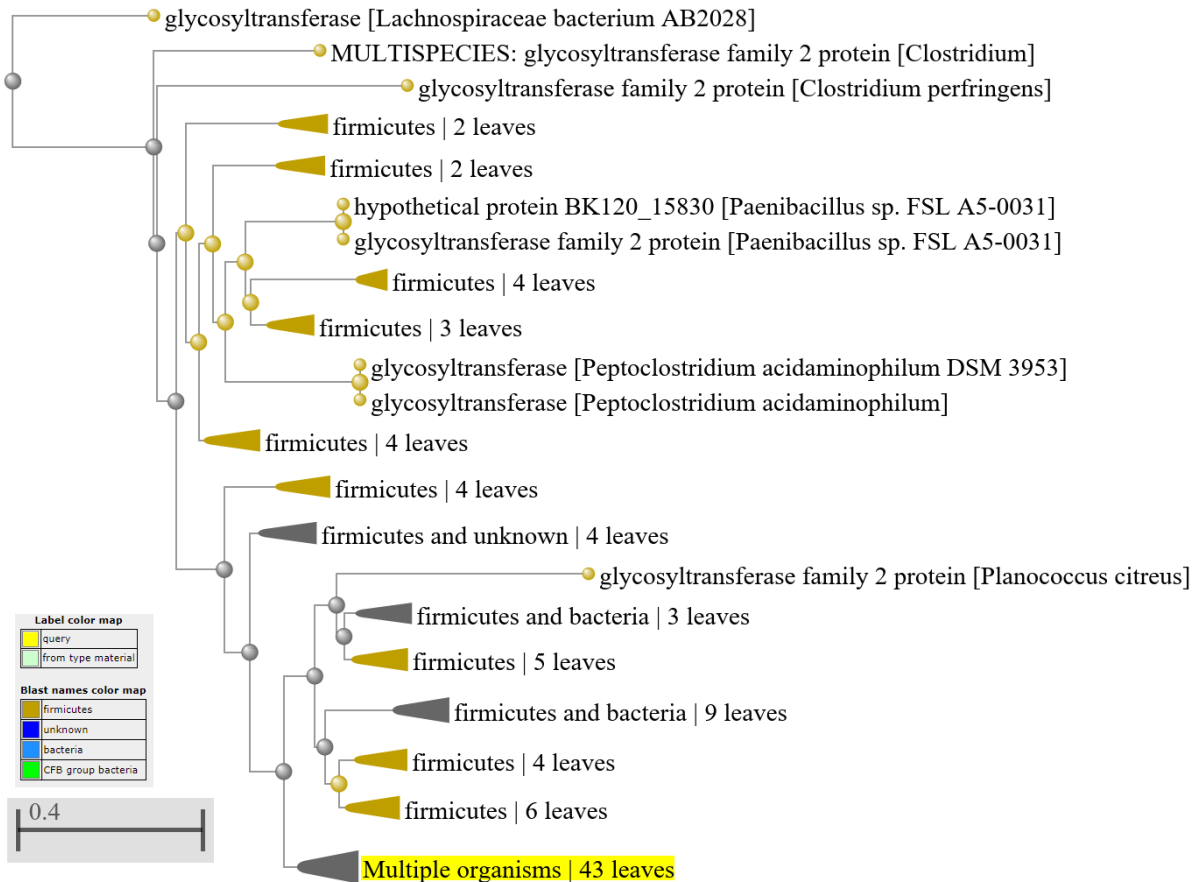

## 10- MESINF\_0559\_0675: glycosyl transferases

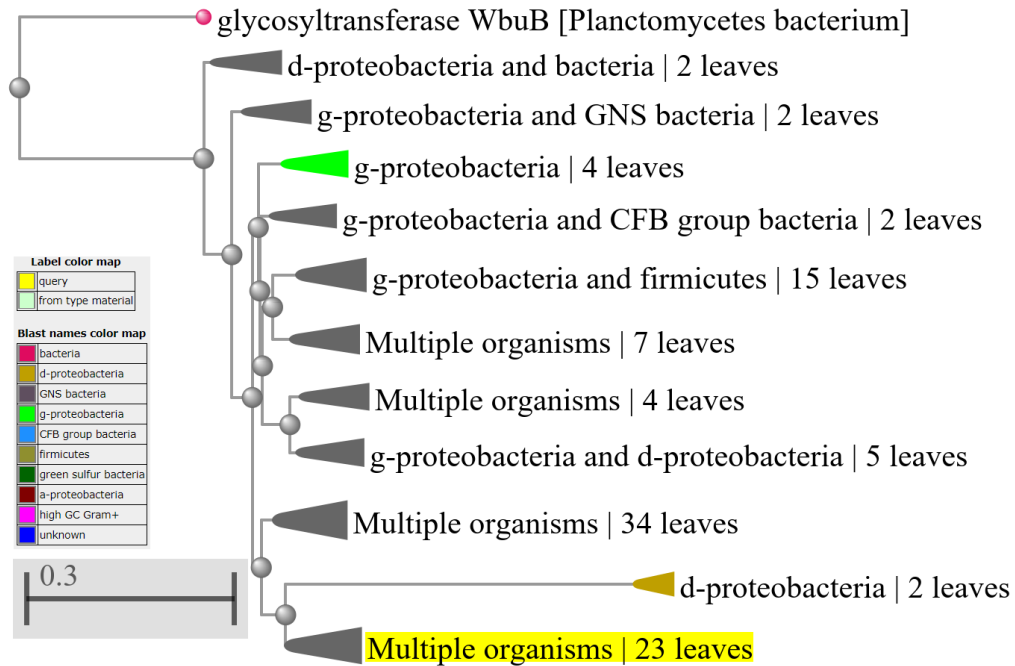

## 11- MESINF\_0559\_0668: Nucleotidyl transferase AbiEii/AbiGii toxin family protein

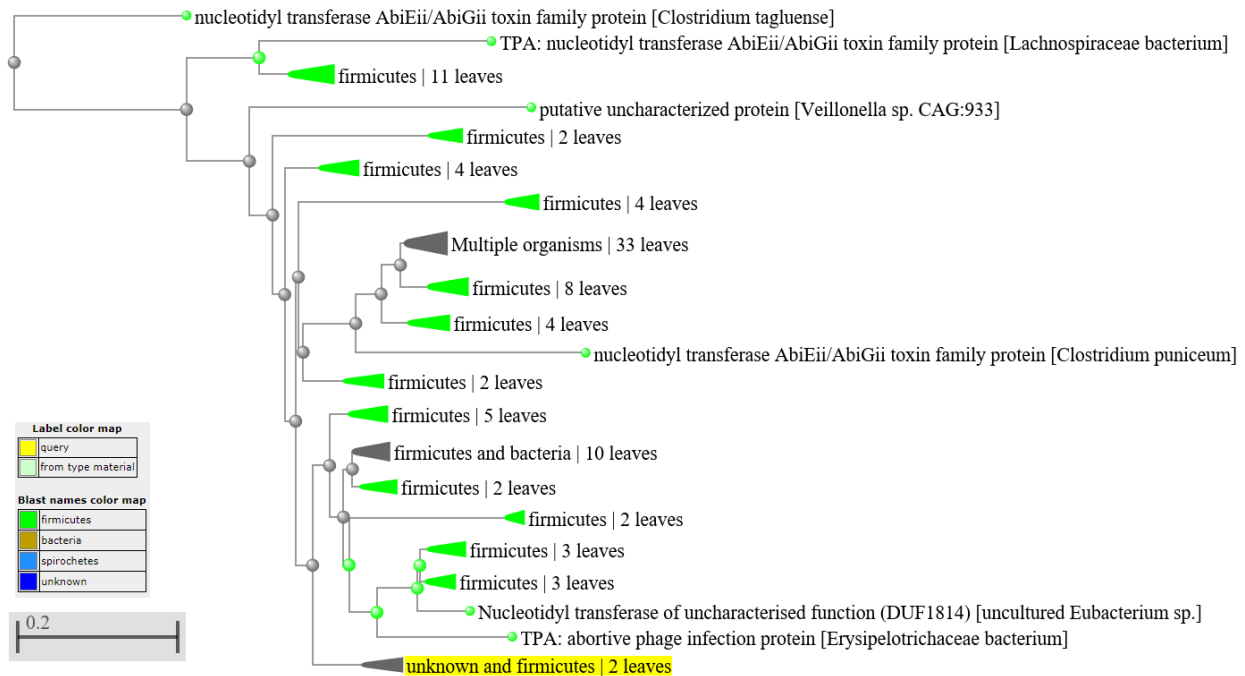

## 12- MESINF\_0559\_0708: Nucleotidyl transferase AbiEii/AbiGii toxin family protein

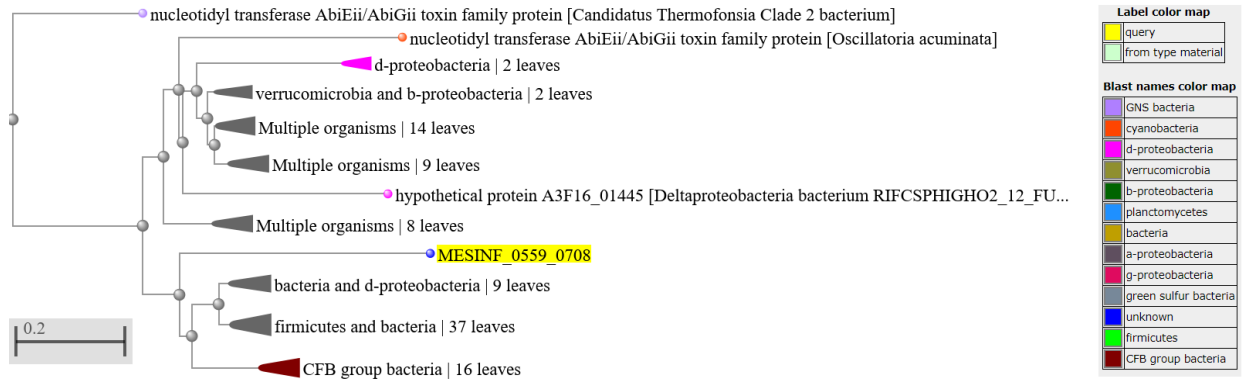

## 13- MESINF\_0559\_0683: Polysaccharide pyruvyl transferase

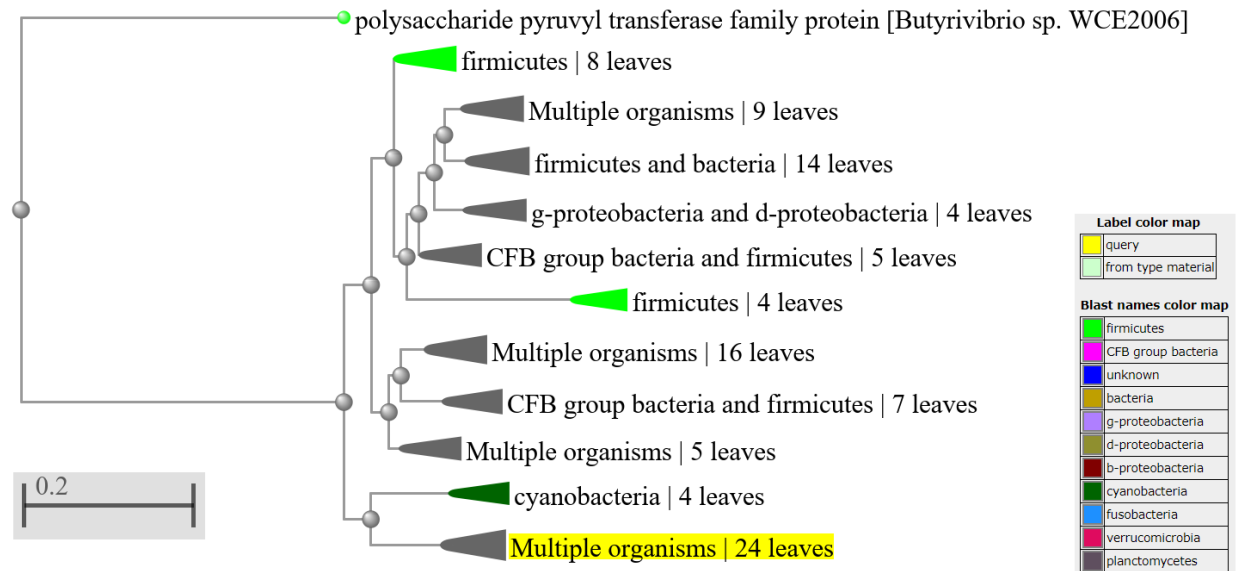

#### 14- MESINF\_0559\_2232: Polysaccharide pyruvyl transferase

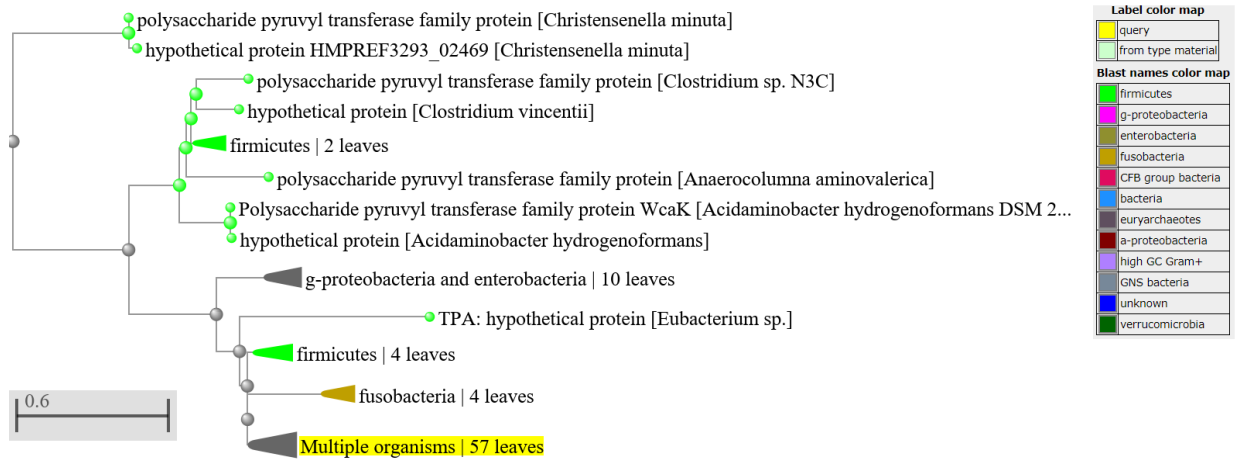

#### 15- MESINF\_0559\_1430: methyltransferase

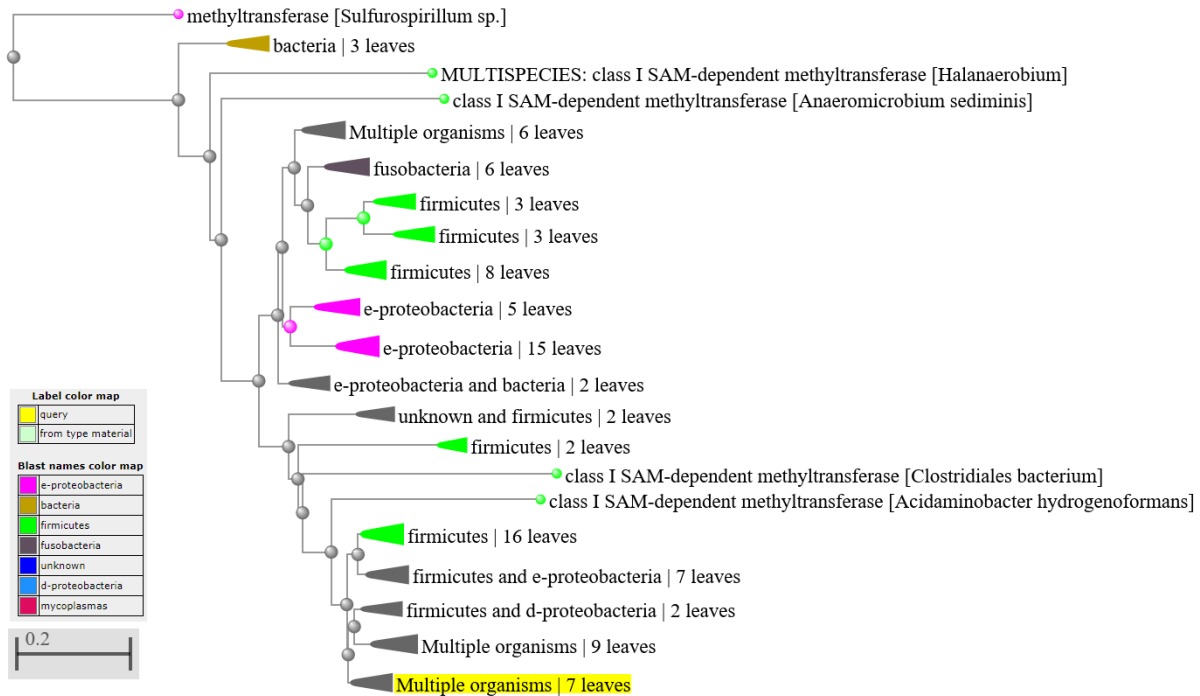

## 16- MESINF\_0559\_1107: ABC transporter

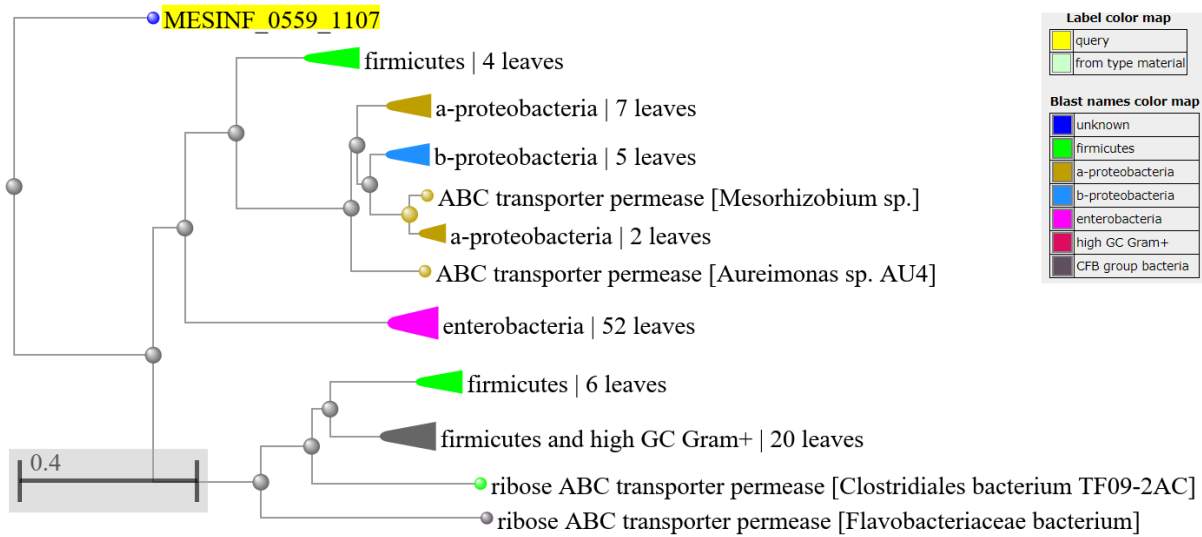

## 17- MESINF\_0559\_0537: ABC transporter permease

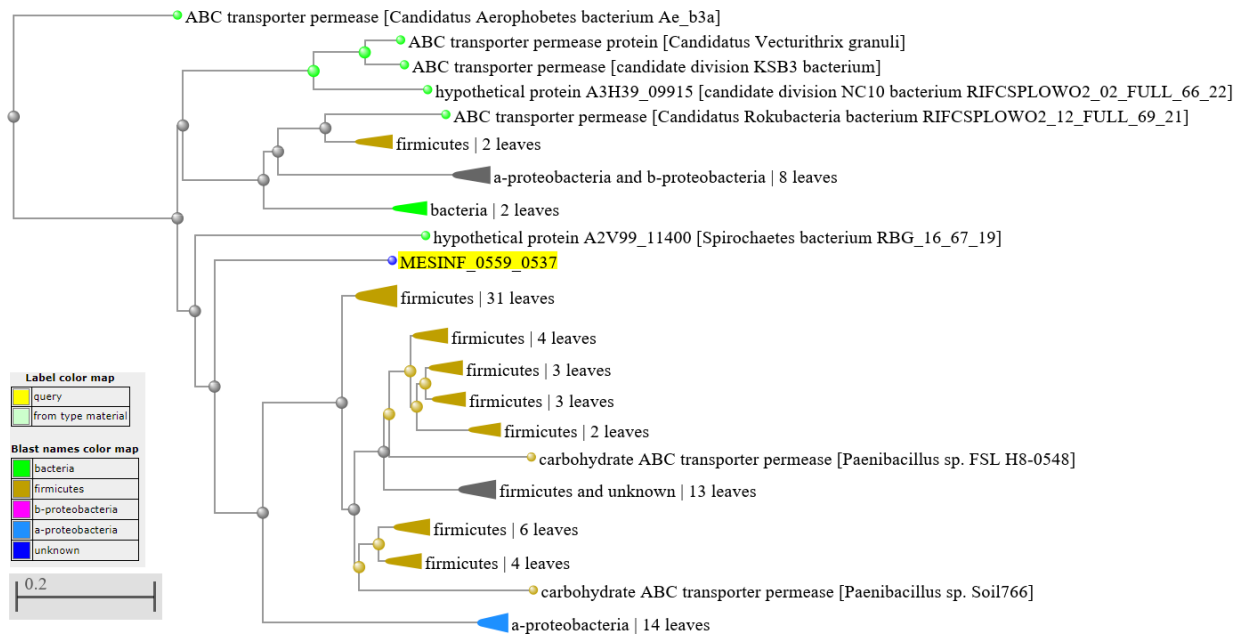

## 18- MESINF\_0559\_0535: ABC transporter substrate binding protein

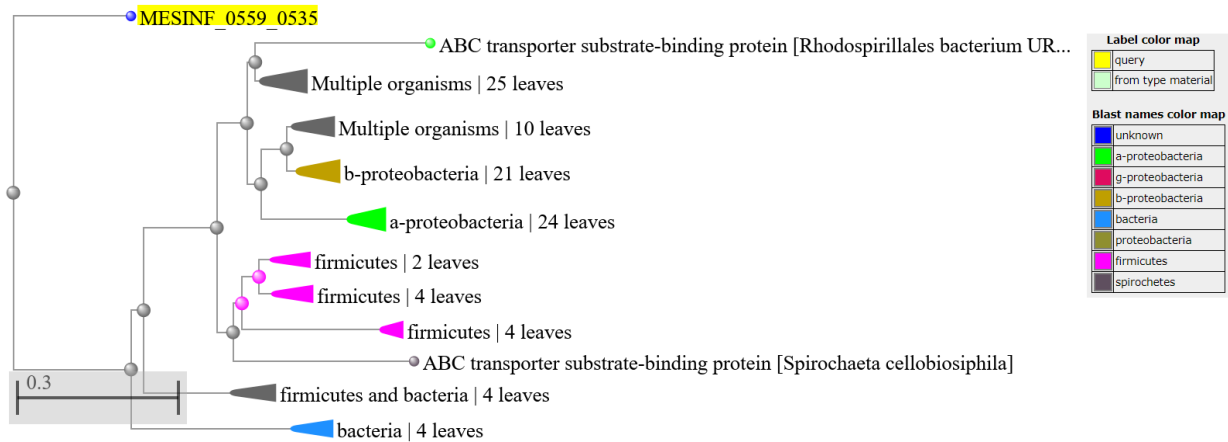

## 19- MESINF\_0559\_2276: ATPase

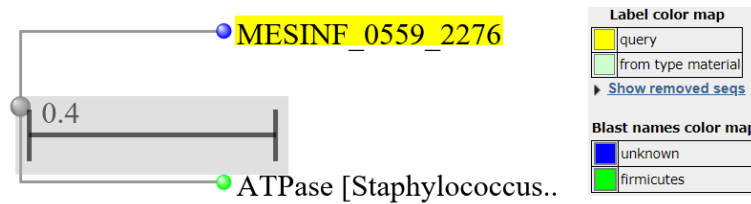

## 20- MESINF\_0559\_0017: ATPase

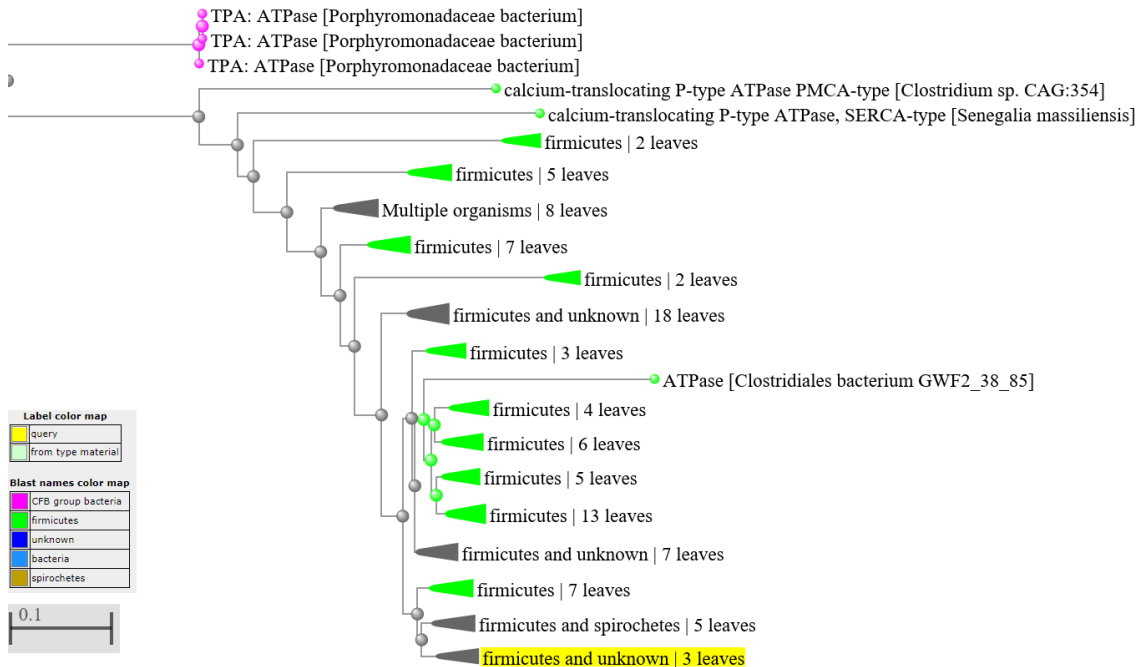

## 21- MESINF\_0559\_0731: ATPase: cation translocating P-Type ATPase

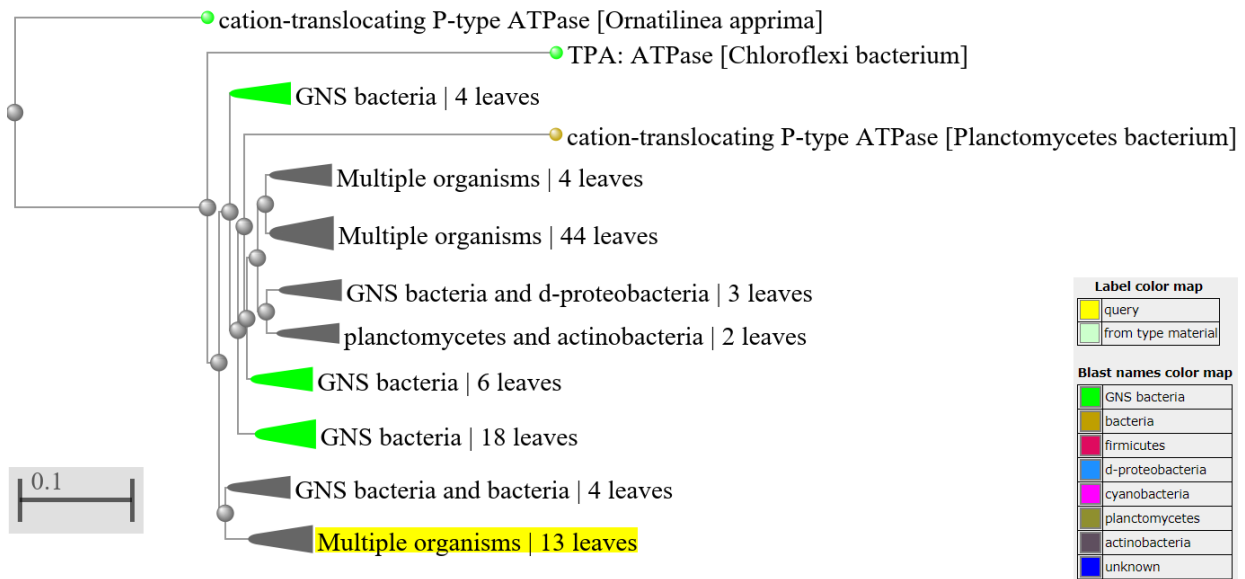

## 22- MESINF\_0559\_2239: ATP-grasp domain-containing protein

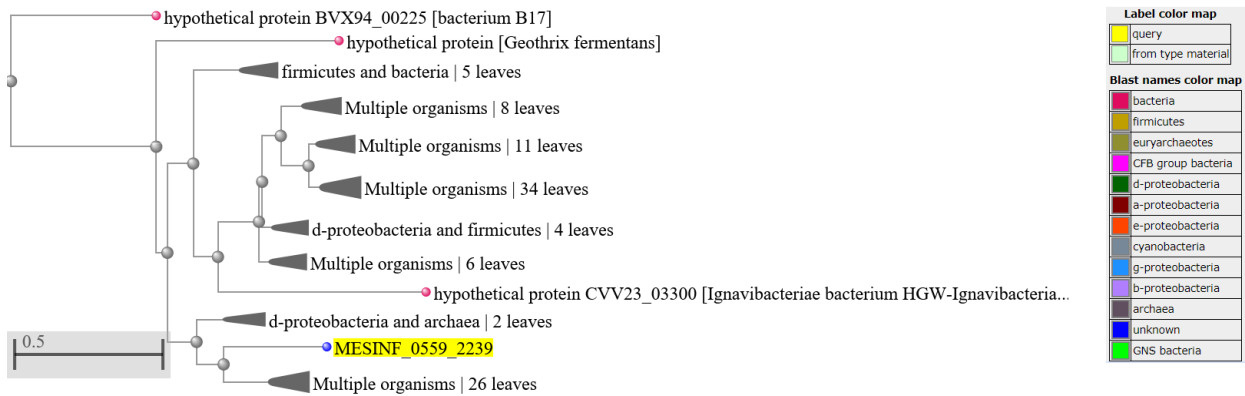

### 23- MESINF\_0559\_0807: Carbohydrate ABC transporter

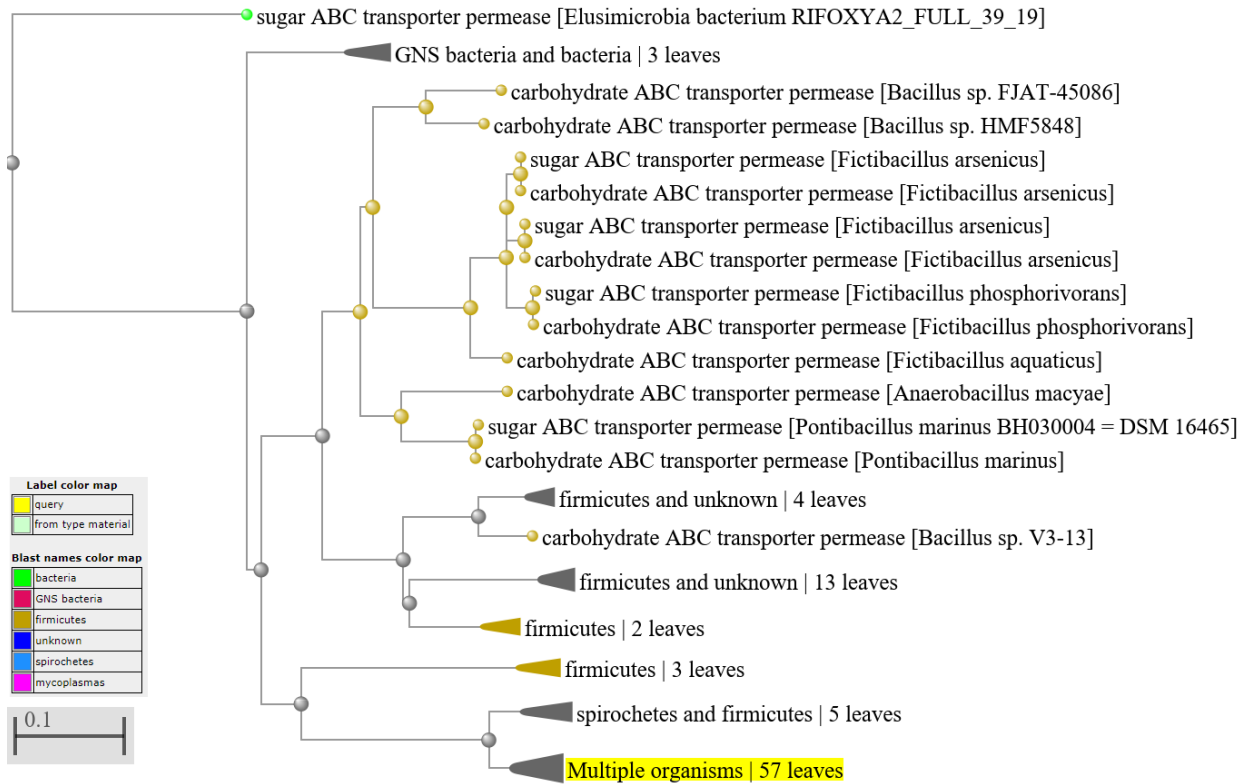

### 24- MESINF\_0559\_0808: Carbohydrate ABC transporter

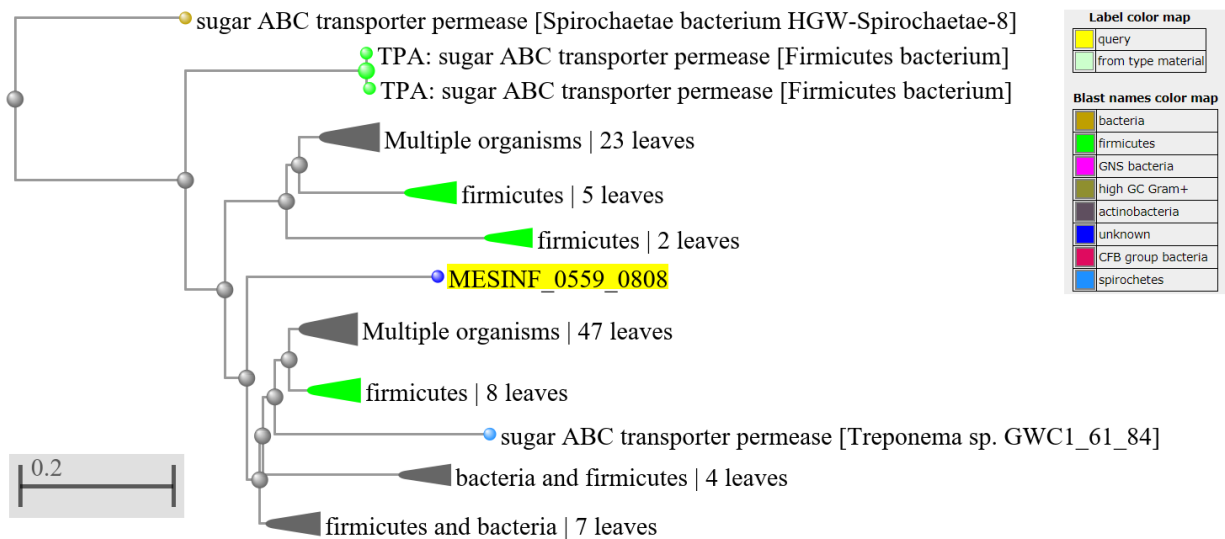

## 25- MESINF\_0559\_1109: Carbohydrate ABC transporter

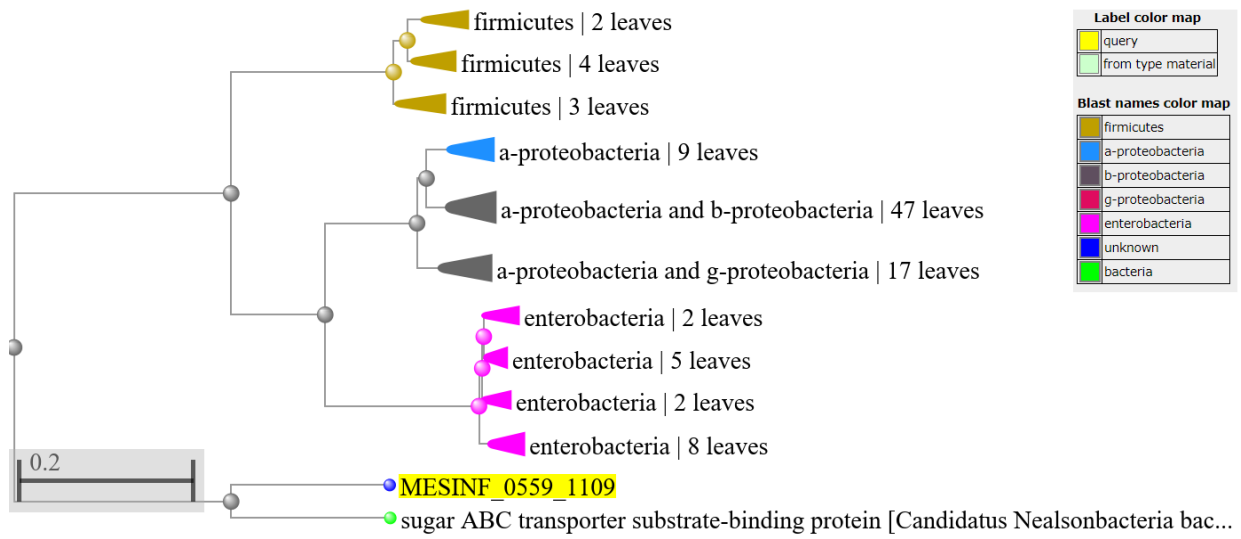

## 26- MESINF\_0559\_2266: EAL domain-containing protein

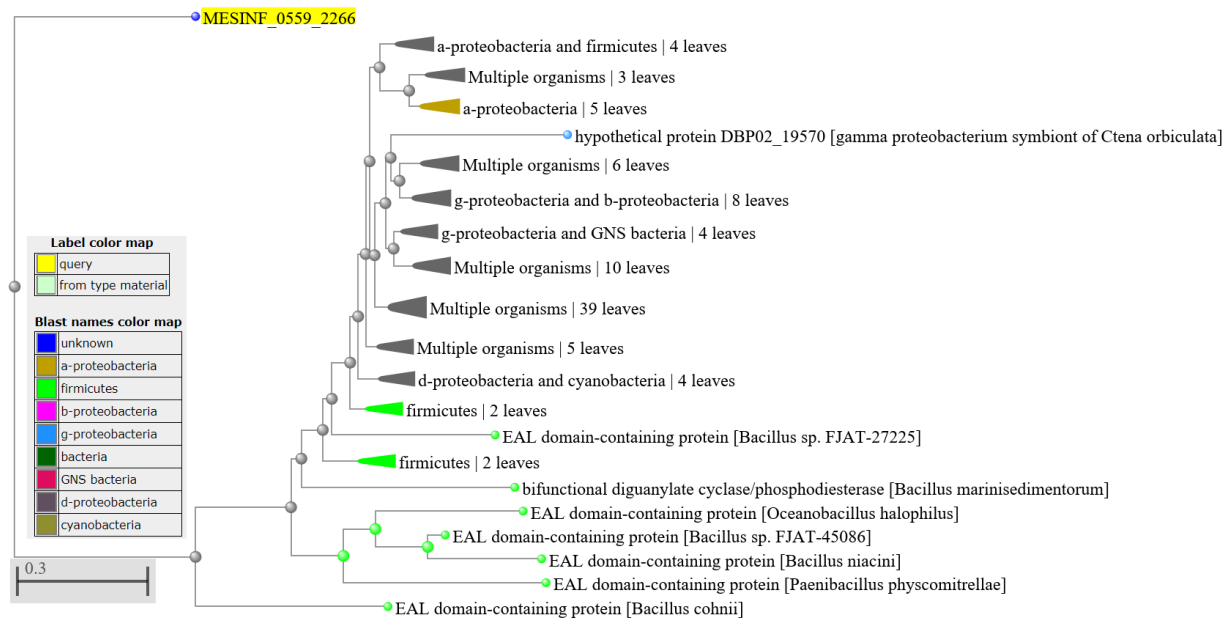

## 27- MESINF\_0559\_0559: Phosphoribosylformylglycinamide synthase subunit PurL

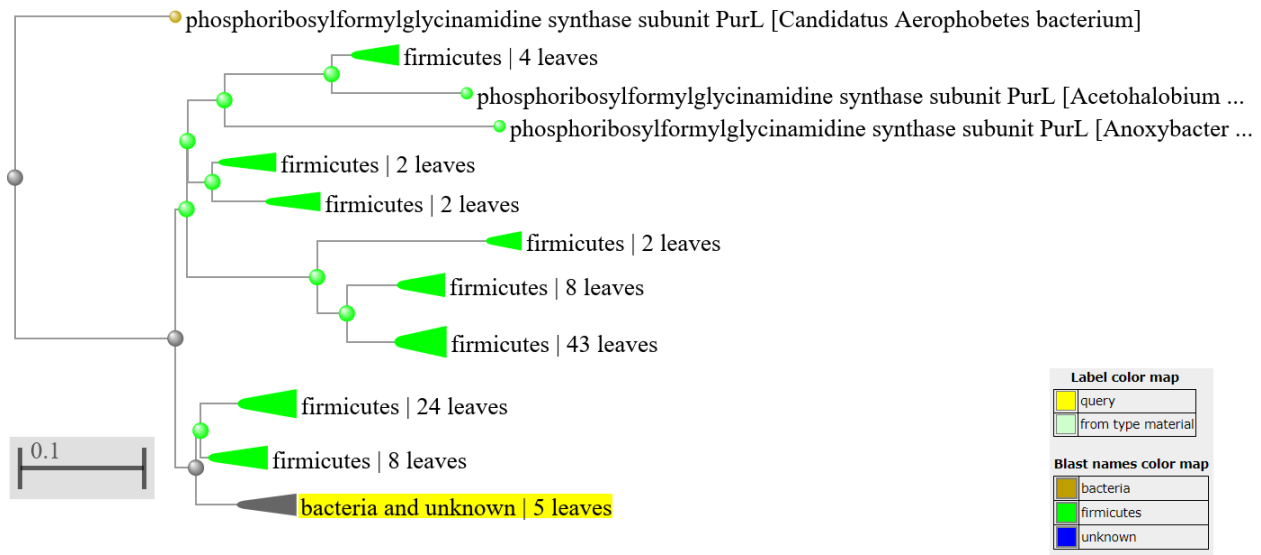

## 28- MESINF\_0559\_0437: polyphosphate

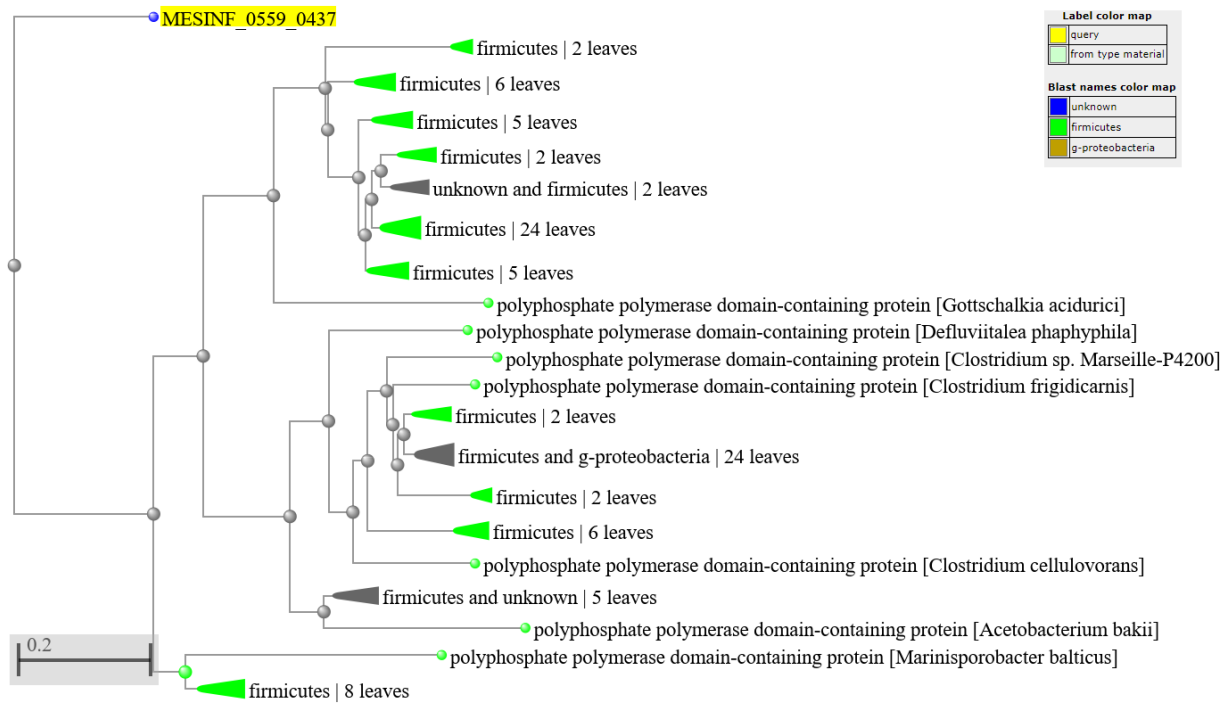

## 29- MESINF\_0559\_0078: Pyridoxamine 5'-phosphate oxidase

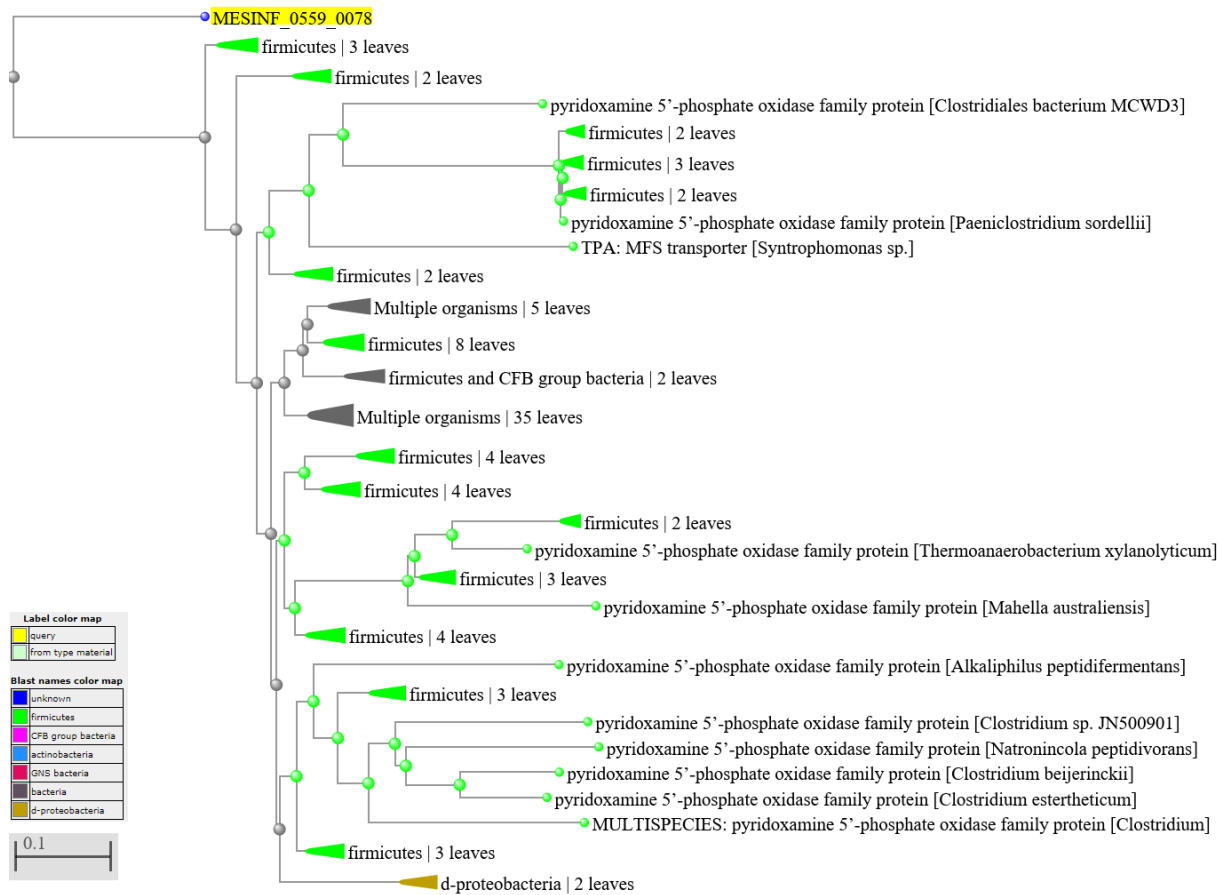

## 30- MESINF\_0559\_1439: Transposase

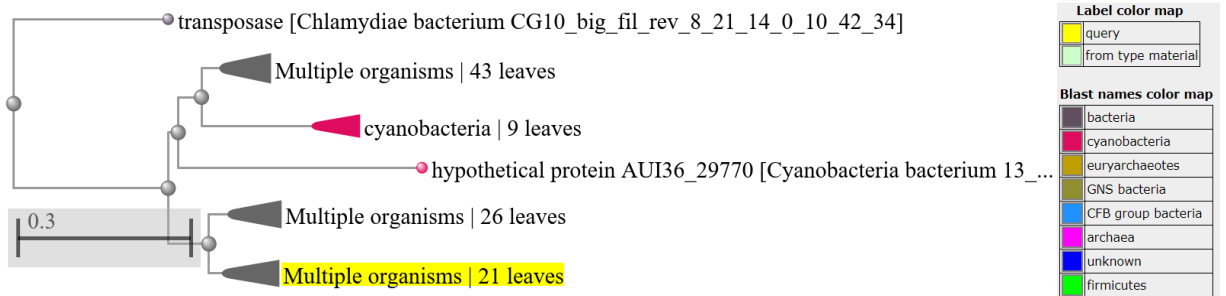

### 31- MESINF\_0559\_0137: Transposase

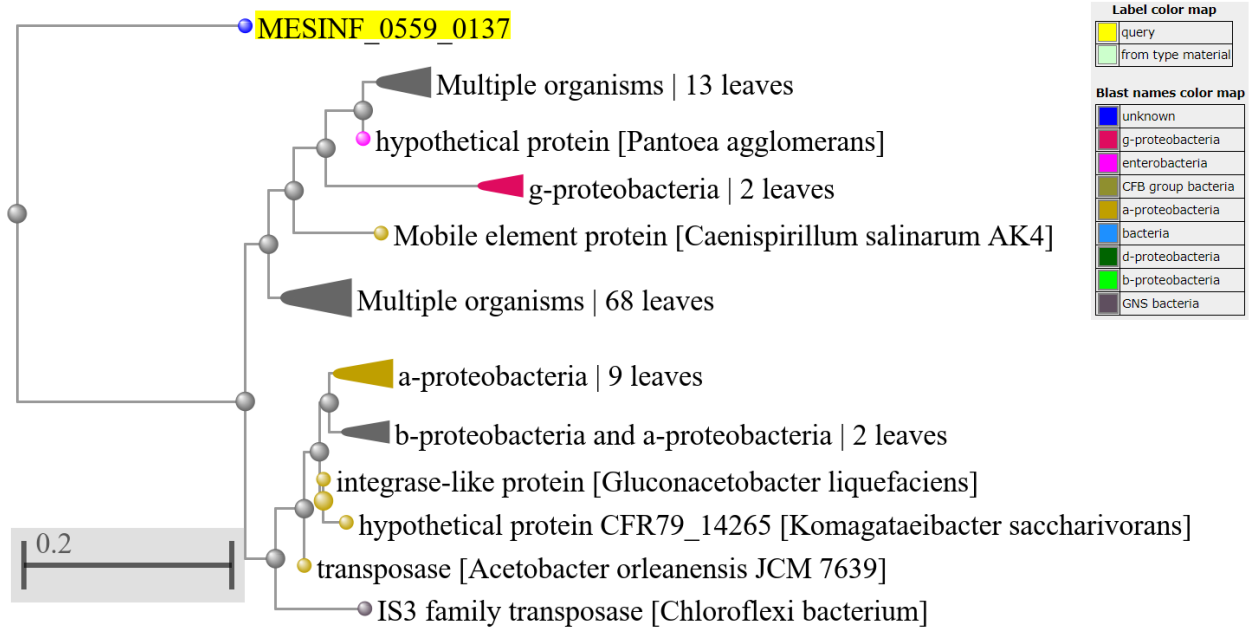

### 32- MESINF\_0559\_0609: Transposase

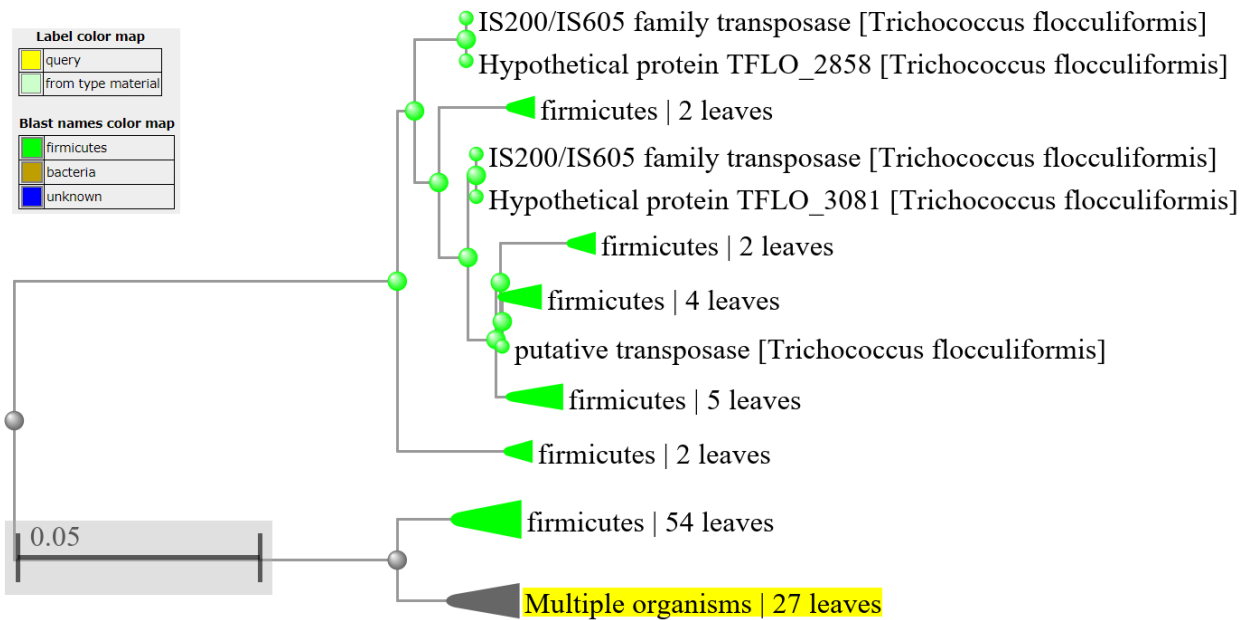

33- MESINF\_0559\_2027: Transposase

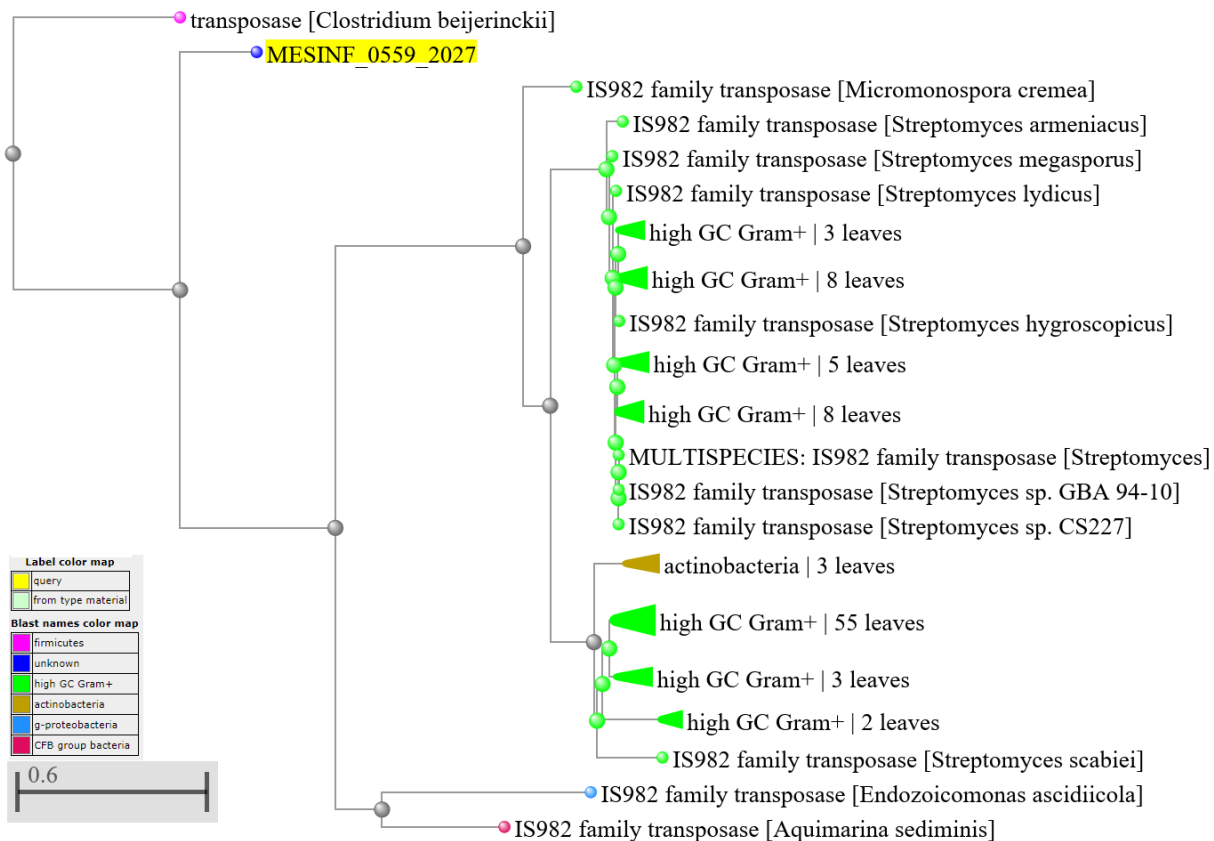

### 34- MESINF\_0559\_1396: Transposase

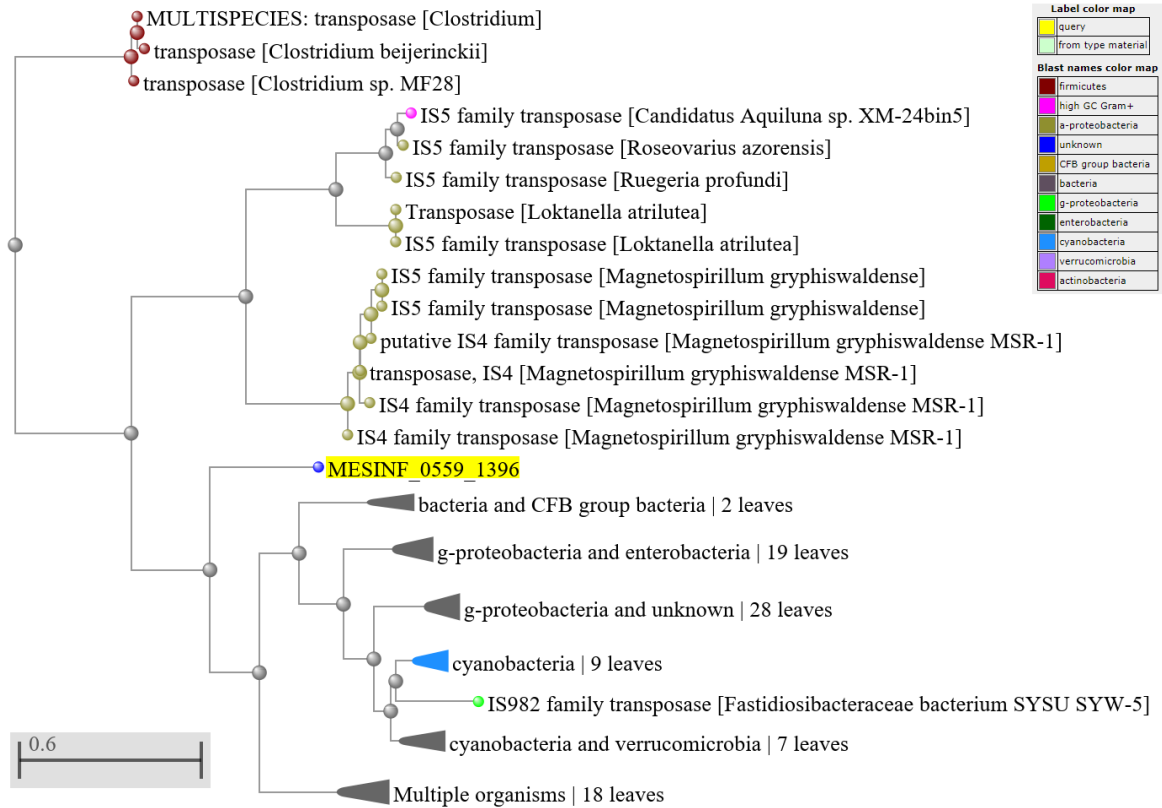

### 35- MESINF\_0559\_2709: Transposase

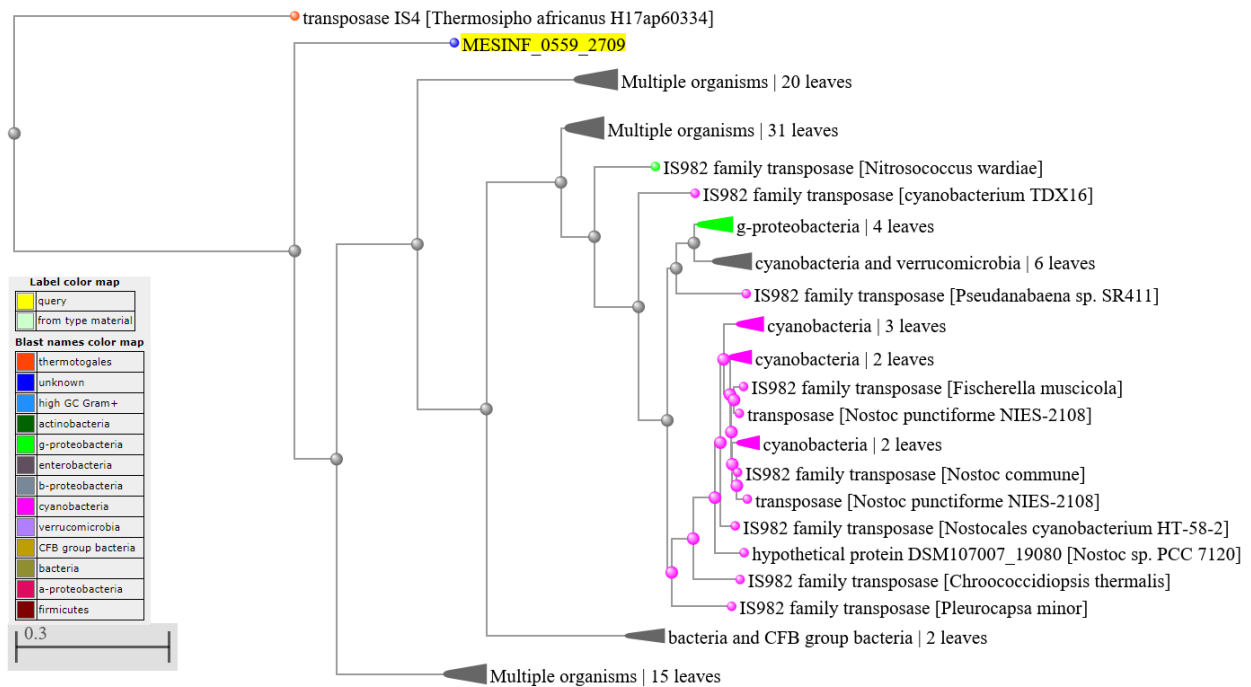

### 36- MESINF\_0559\_2639: Transposase

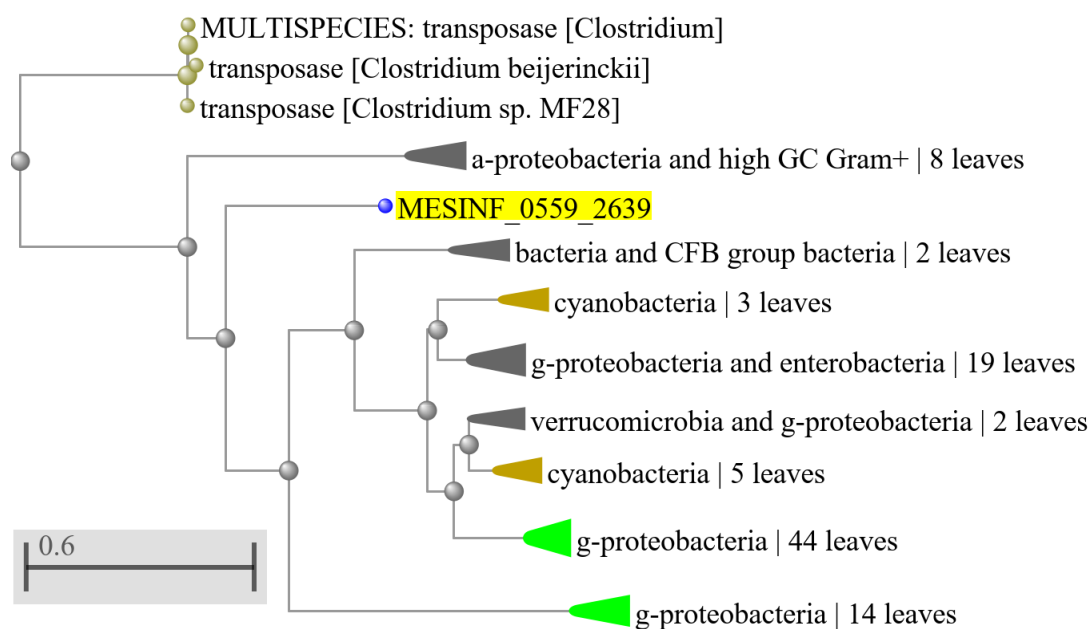

### 37- MESINF\_0559\_0608: Transposase

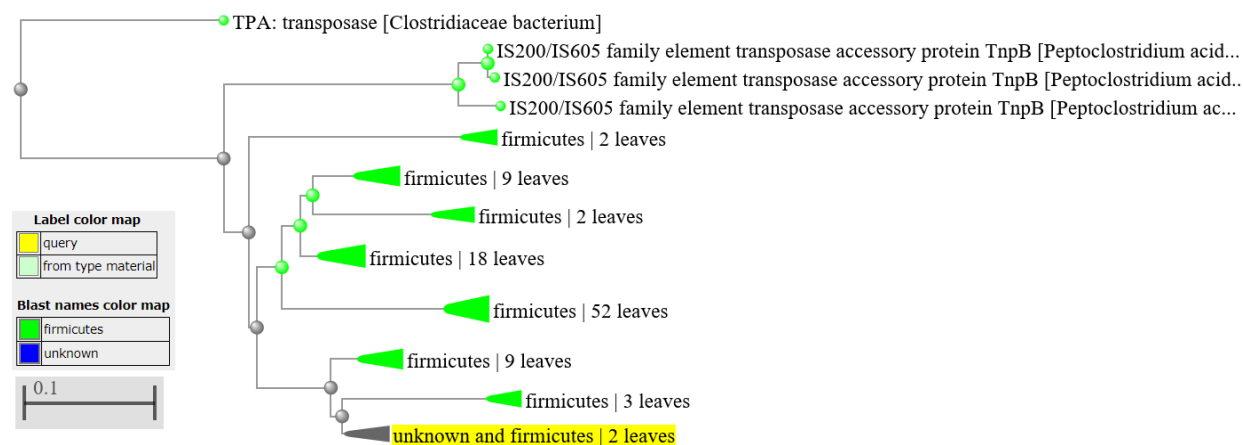

### 38- MESINF\_0559\_1435: 2-hydroxypropyl-CoA dehydratase

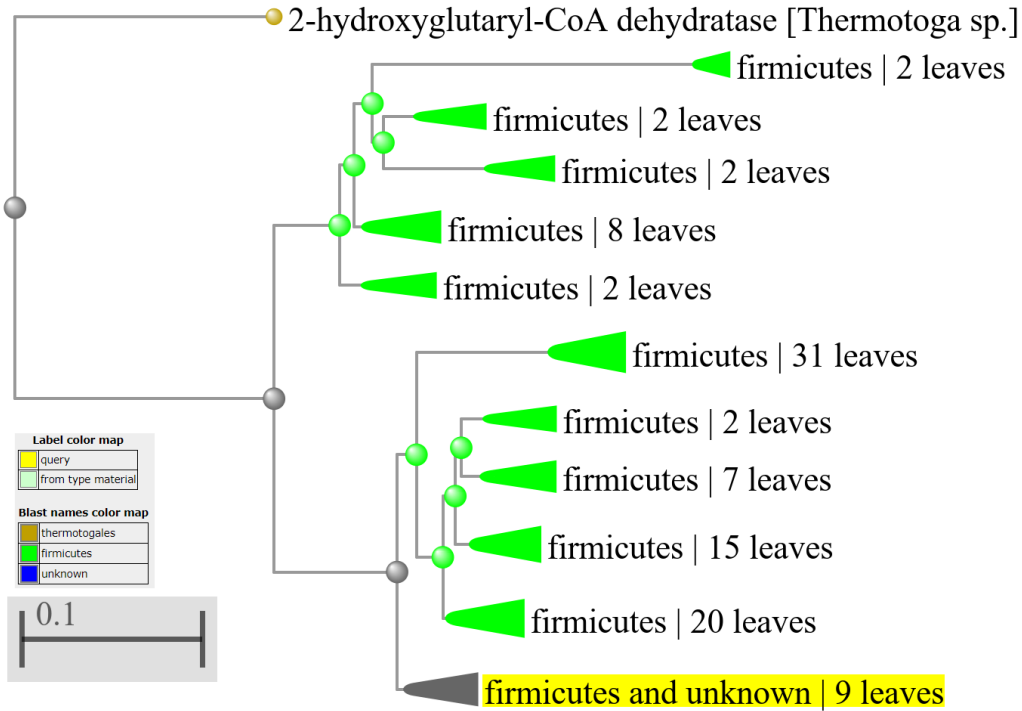

### 39- MESINF\_0559\_0604: alpha/beta fold hydrolase

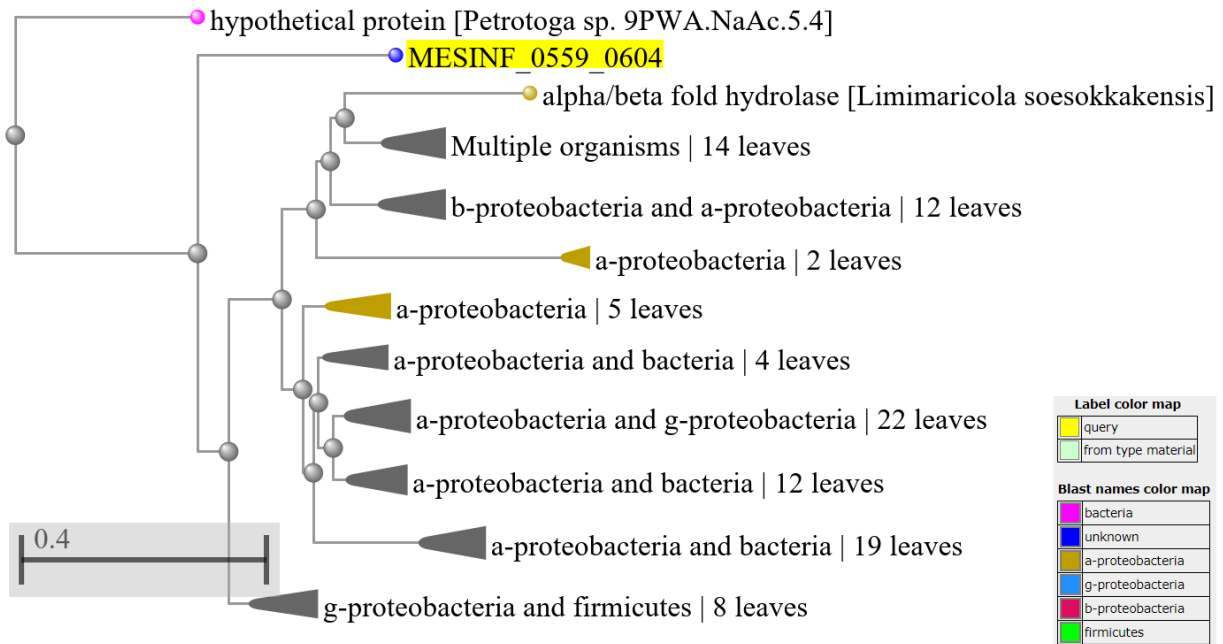

#### 40- MESINF\_0559\_0513: alpha/beta fold hydrolase

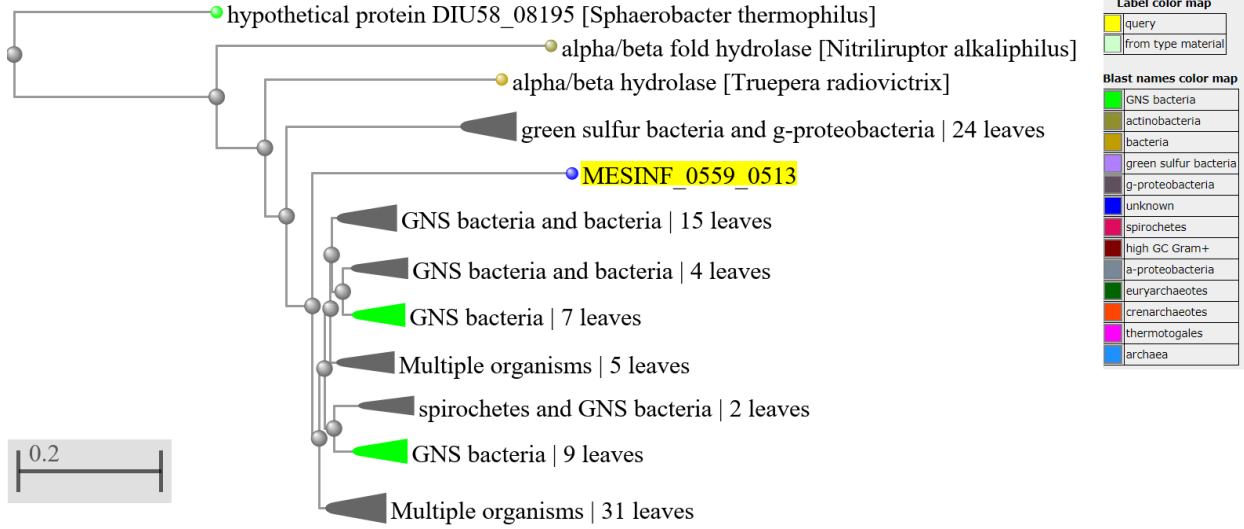

#### 41- MESINF\_0559\_1084: alpha/beta fold hydrolase

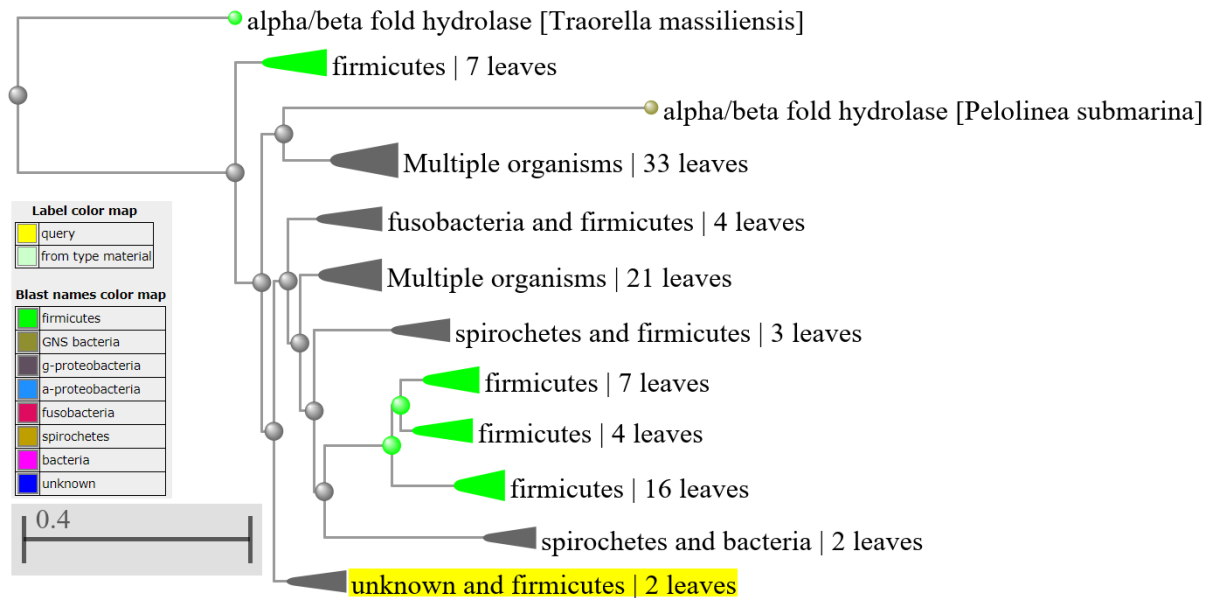

## 42- MESINF\_0559\_1317: Beta glucosidase

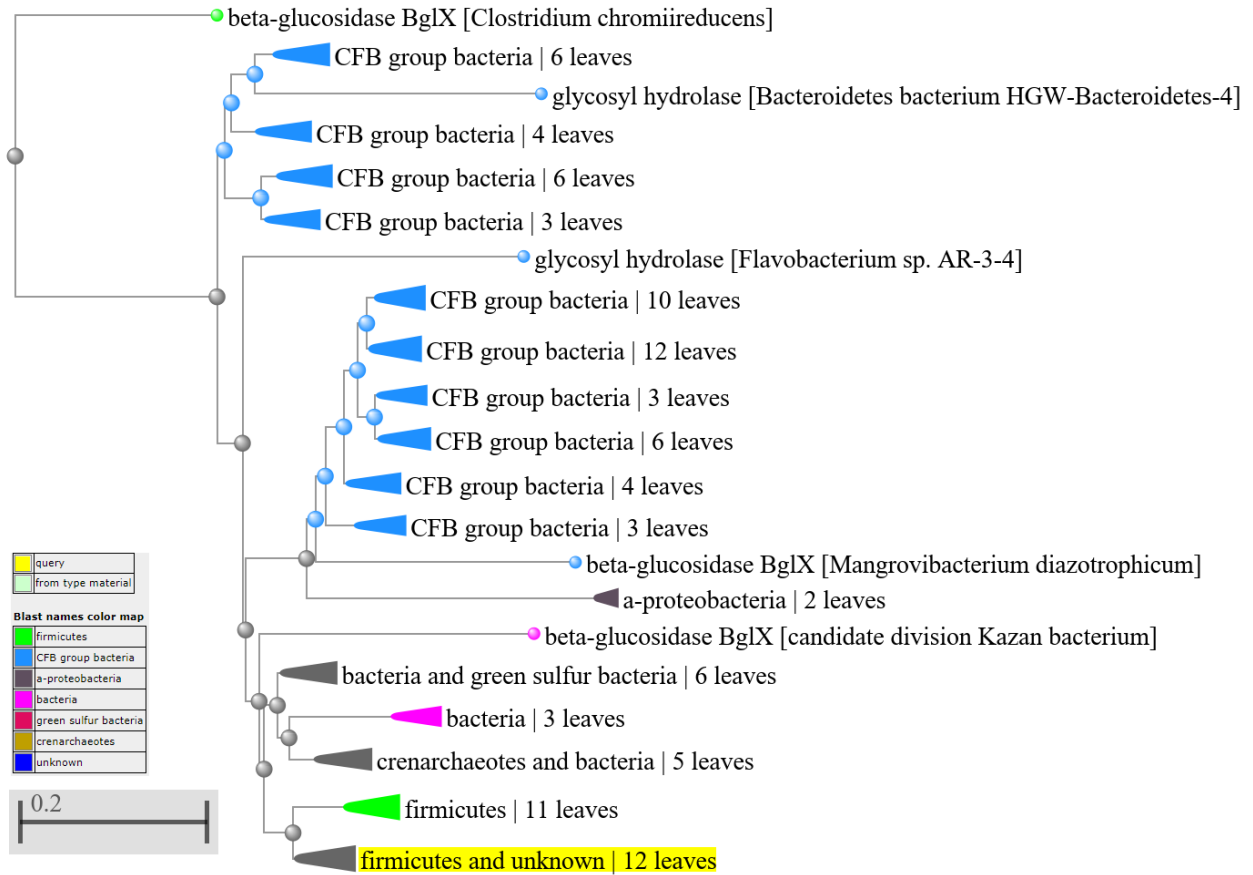

### 43- MESINF\_0559\_0693: carboxypeptidase family protein

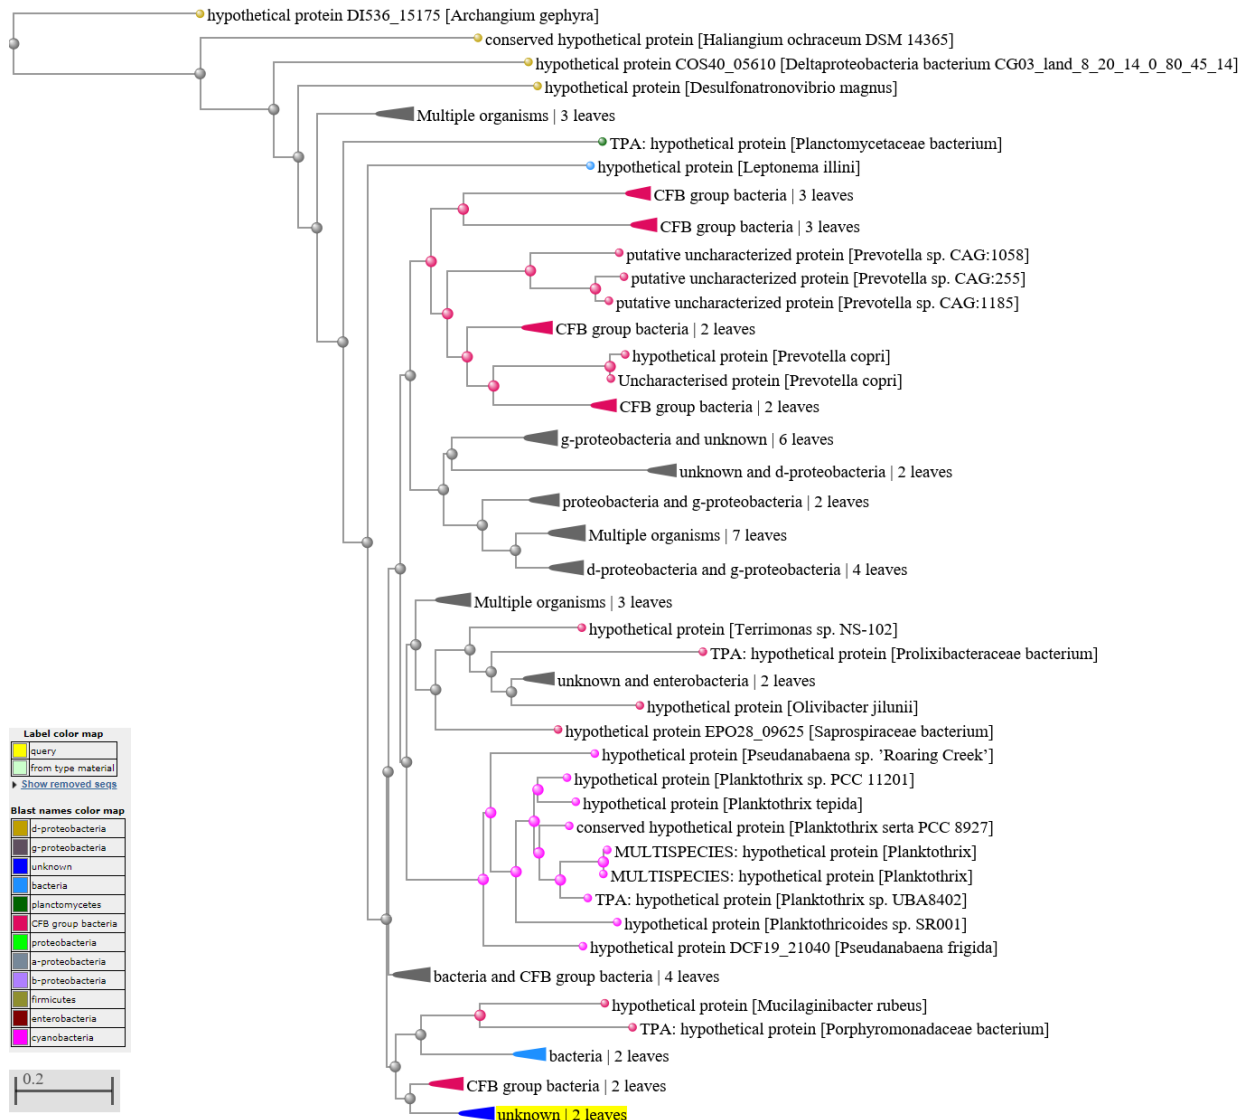

#### 44- MESINF\_0559\_0623: M20/M25/M40 family metallo-hydrolase

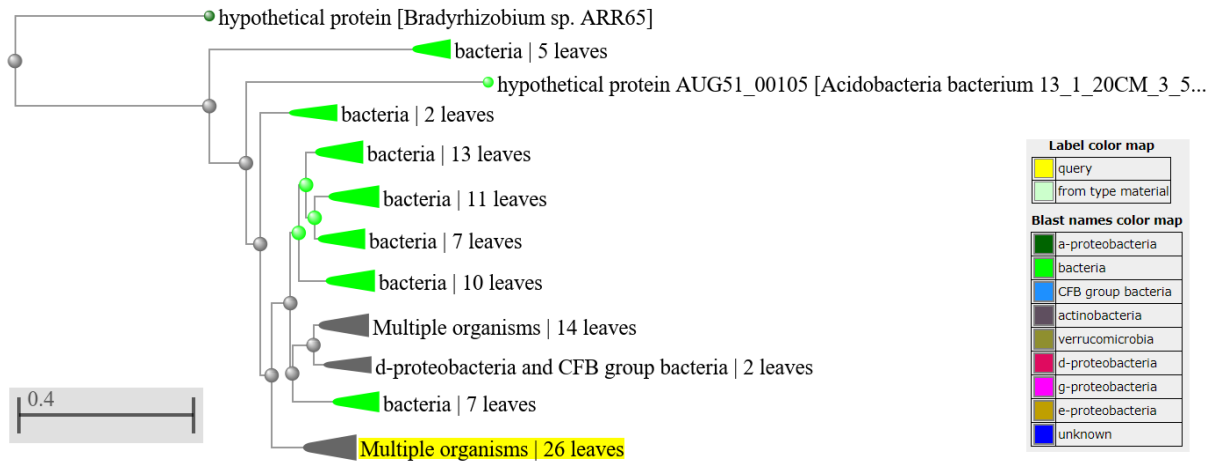

#### 45- MESINF\_0559\_1390: J domain containing proteins

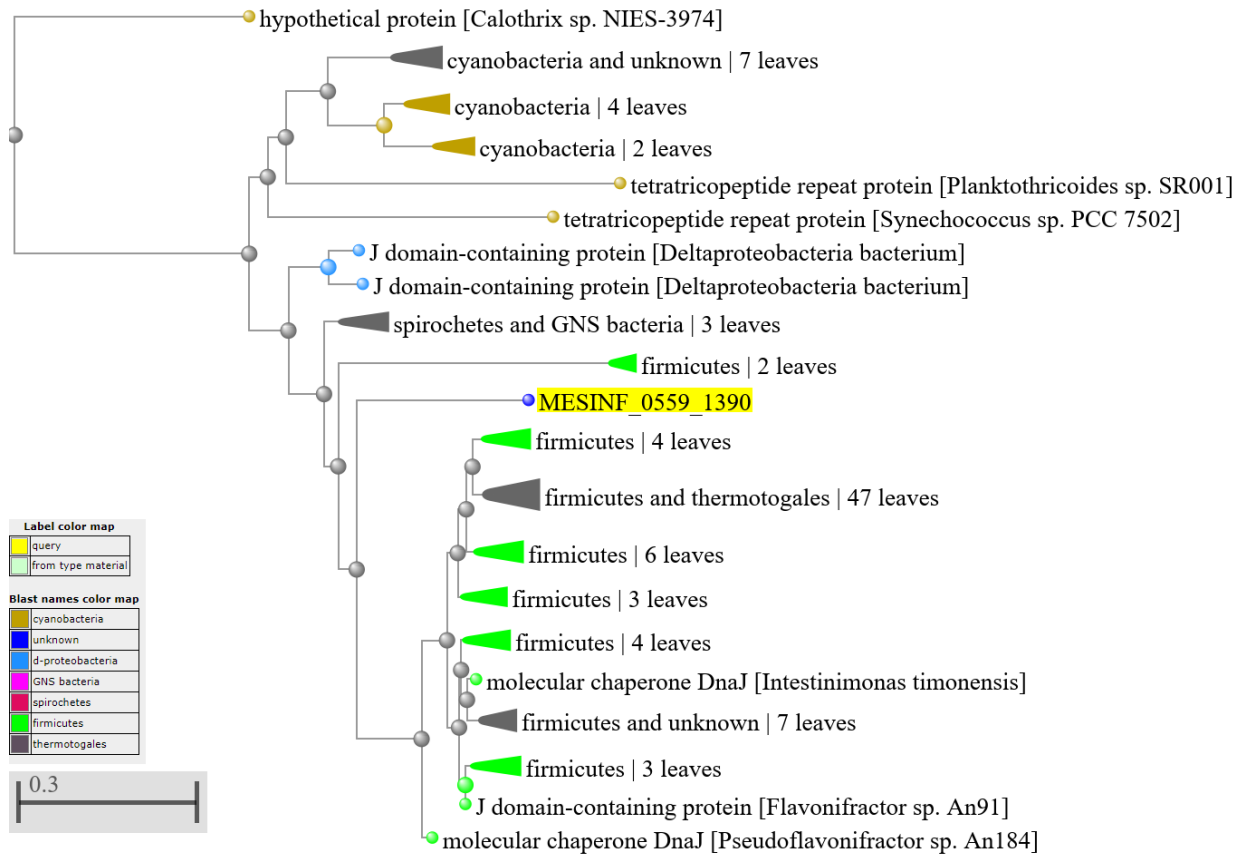

#### 46- MESINF\_0559\_2641: MarR family transcriptional regulator

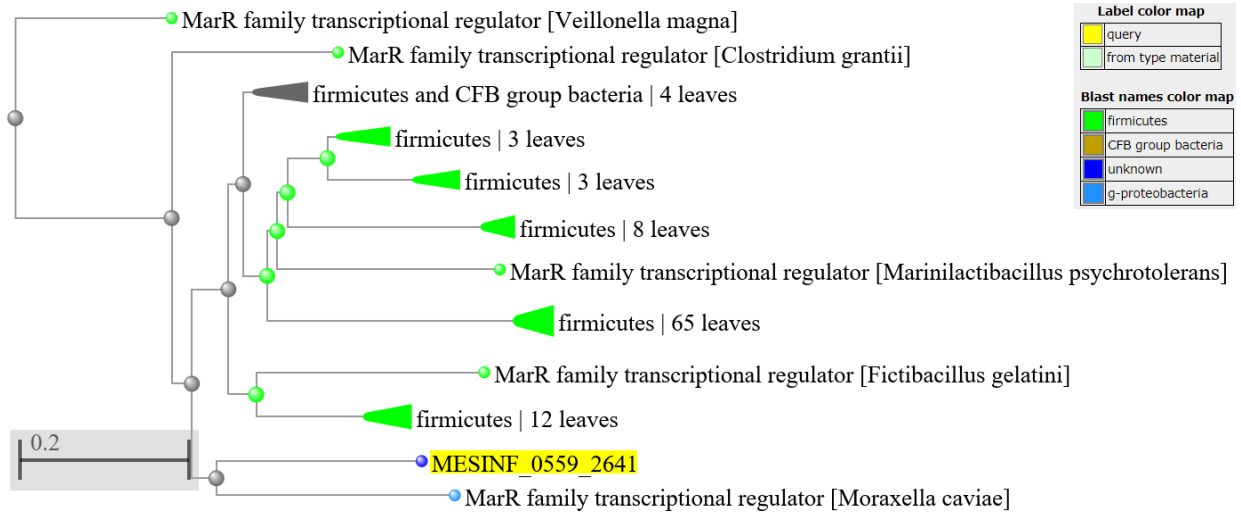

#### 47- MESINF\_0559\_0407: MarR family transcriptional regulator

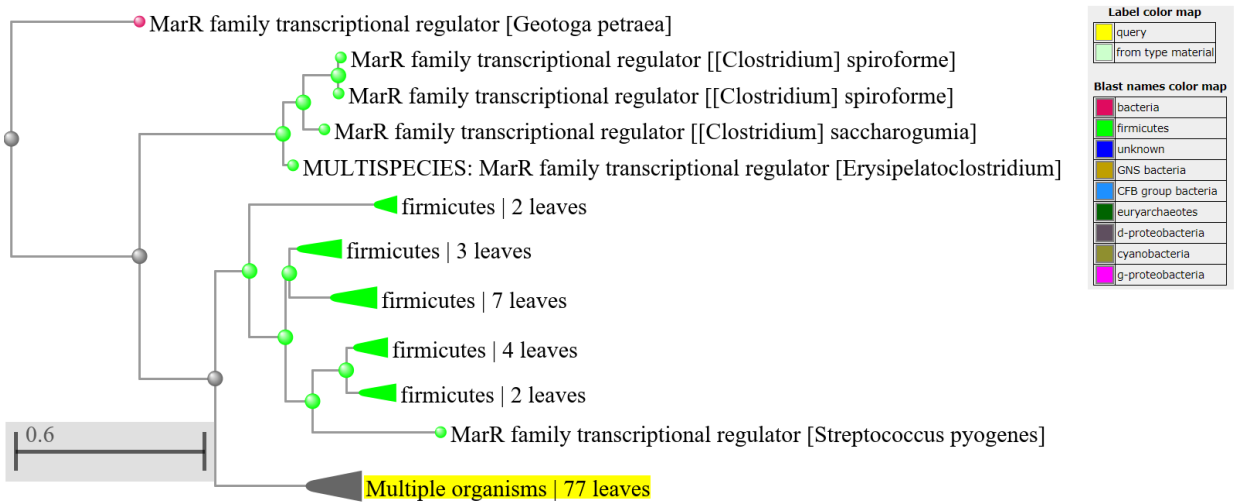

#### 48- MESINF\_0559\_0667: Transcriptional regulator

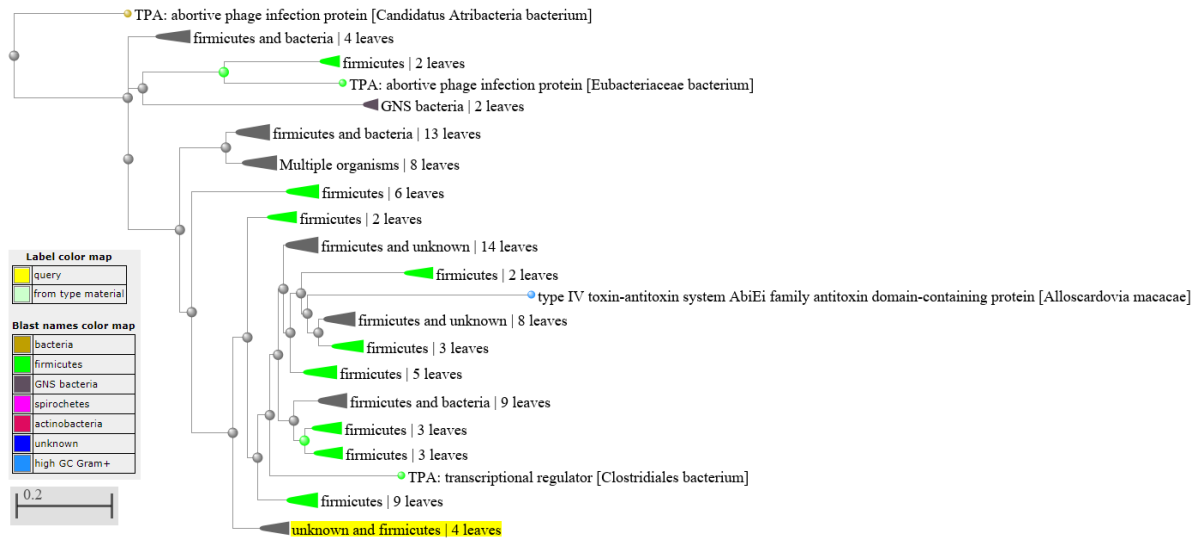

#### 49- MESINF\_0559\_1101: aldehyde ferredoxin oxidoreductase

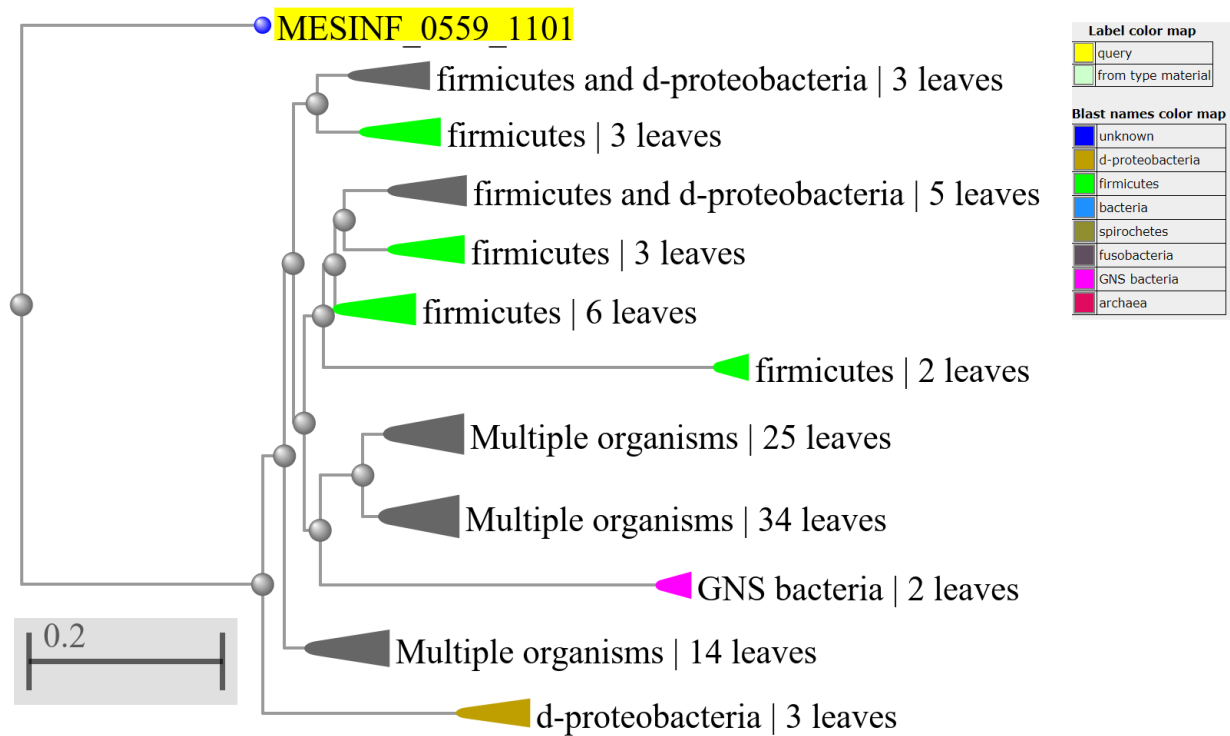

## 50- MESINF\_0559\_0629: Cupin domain-containing protein

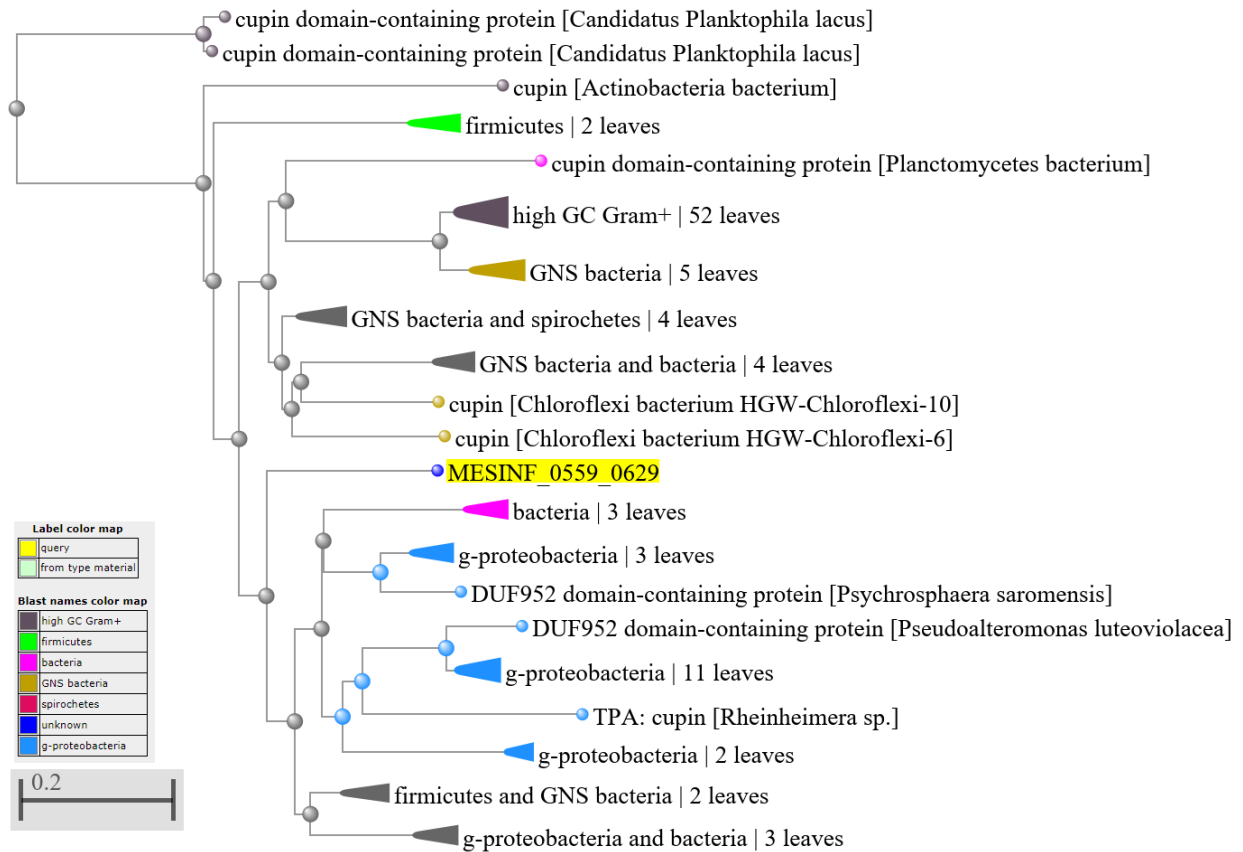

## 51- MESINF\_0559\_1563: DUF1211 domain containing proteins

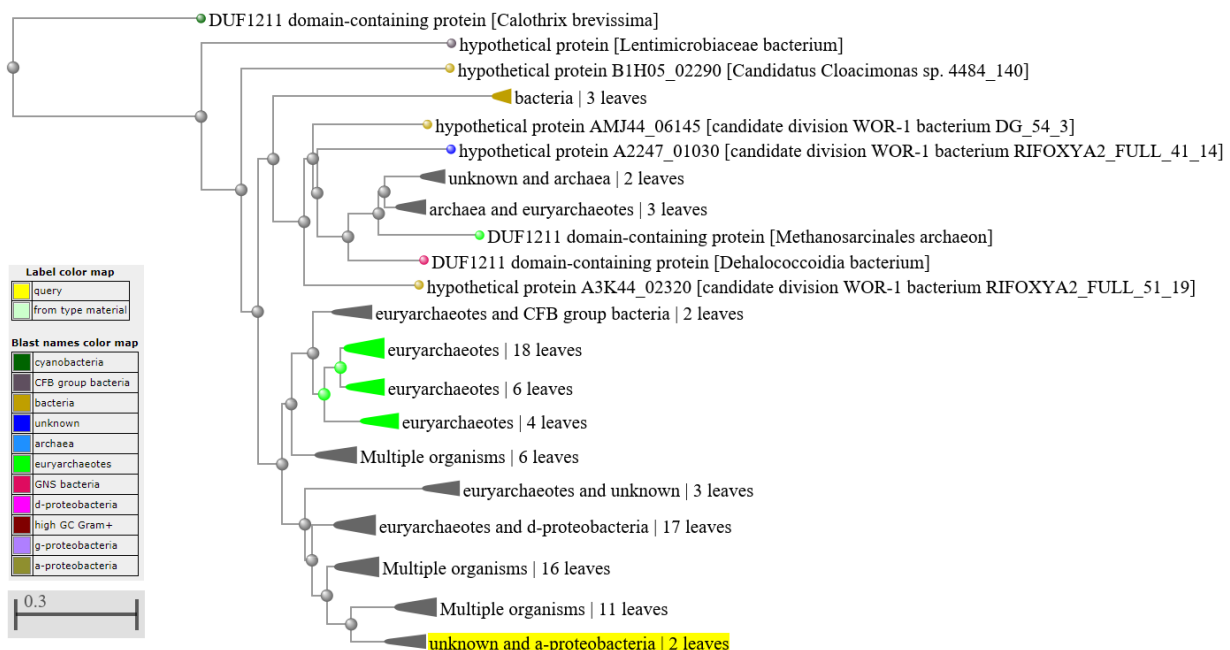

## 52- MESINF\_0559\_0436: DUF4956 domain-containing protein

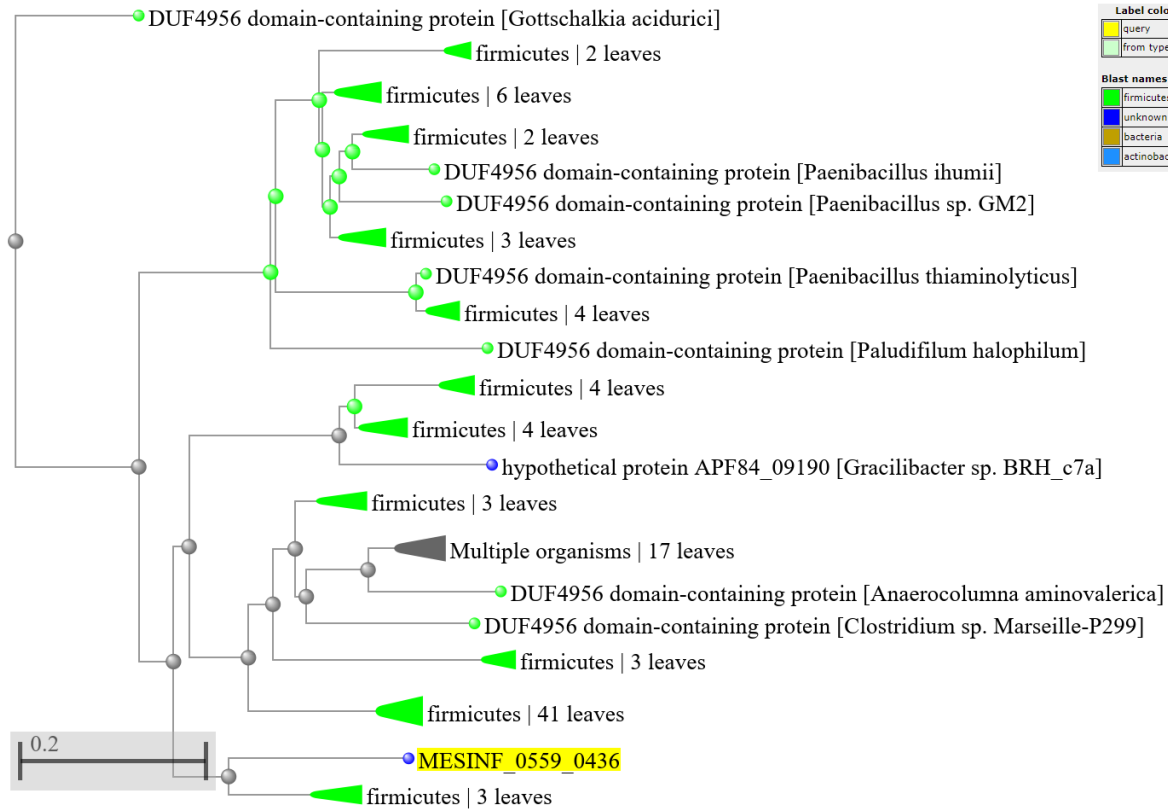

53- MESINF\_0559\_1939: Monooxygenase

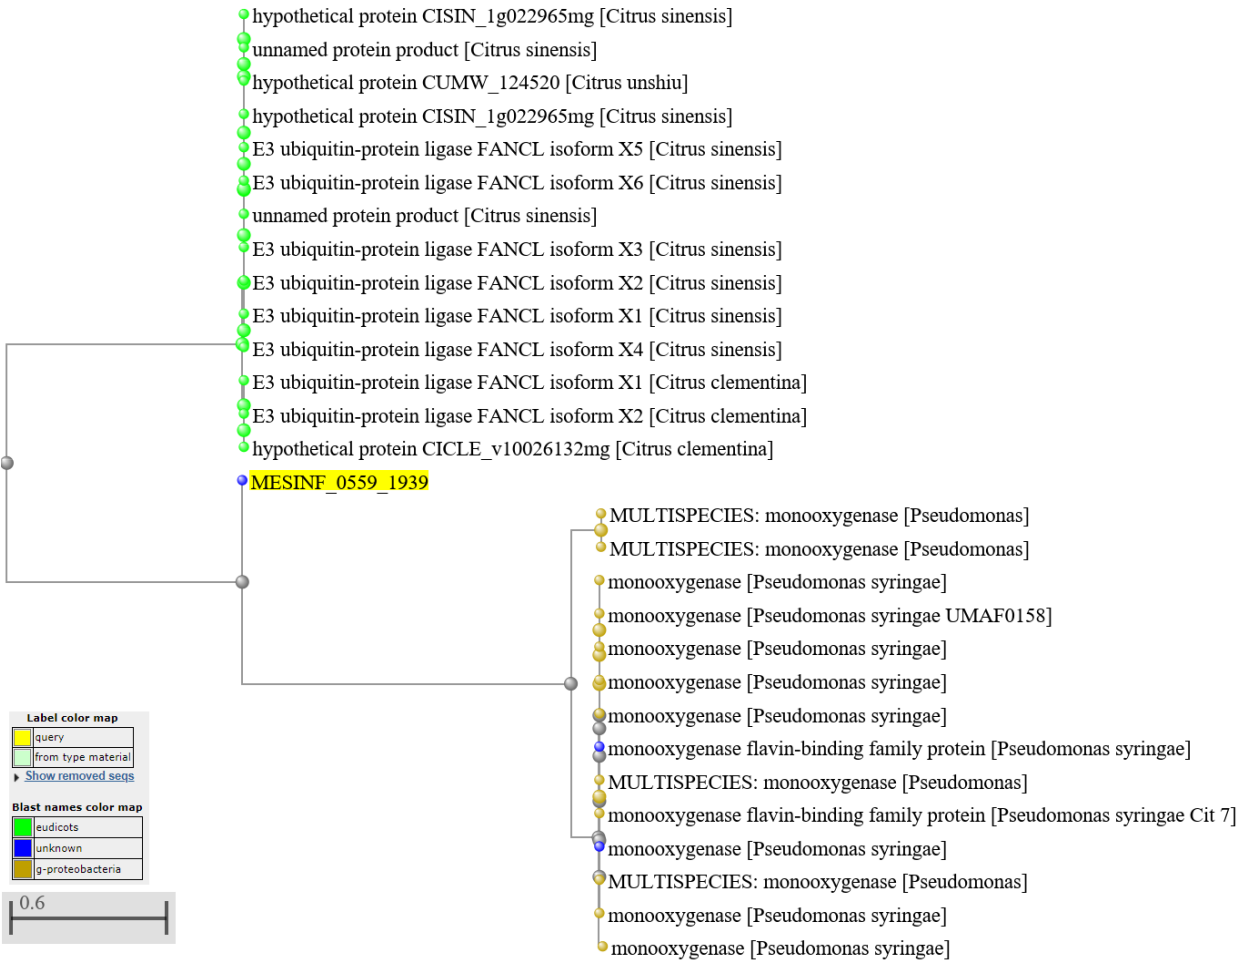

#### 54- MESINF\_0559\_2722: fibronectin type III domain protein

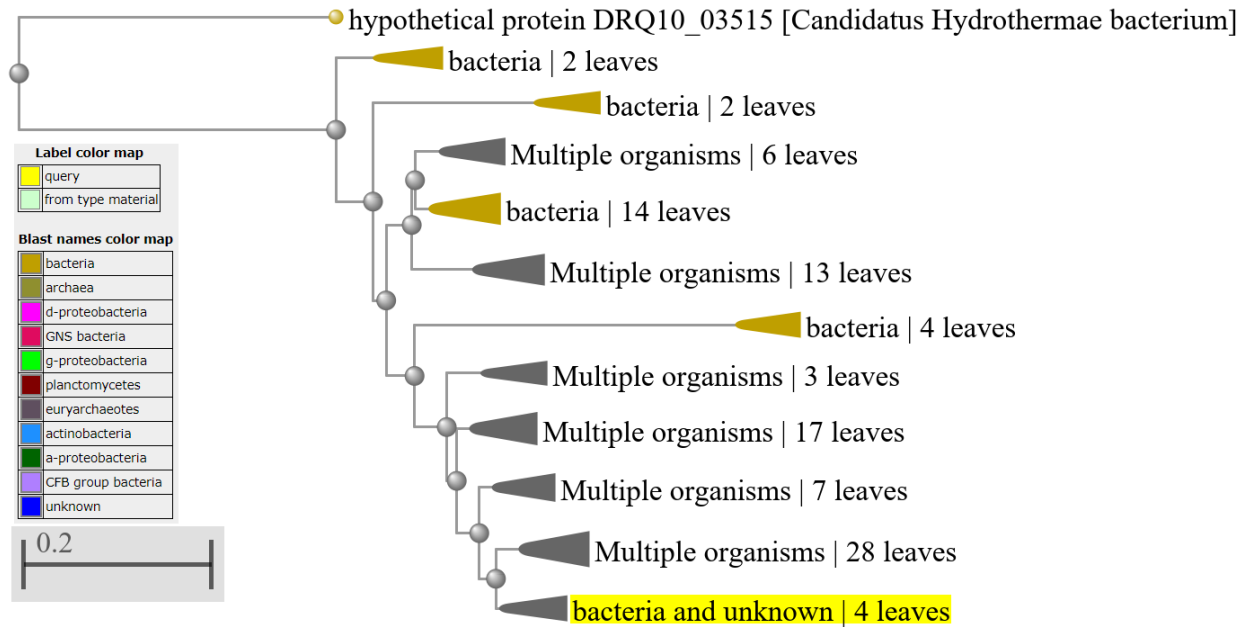

#### 55- MESINF\_0559\_2226: Helix-turn-helix domain-containing protein

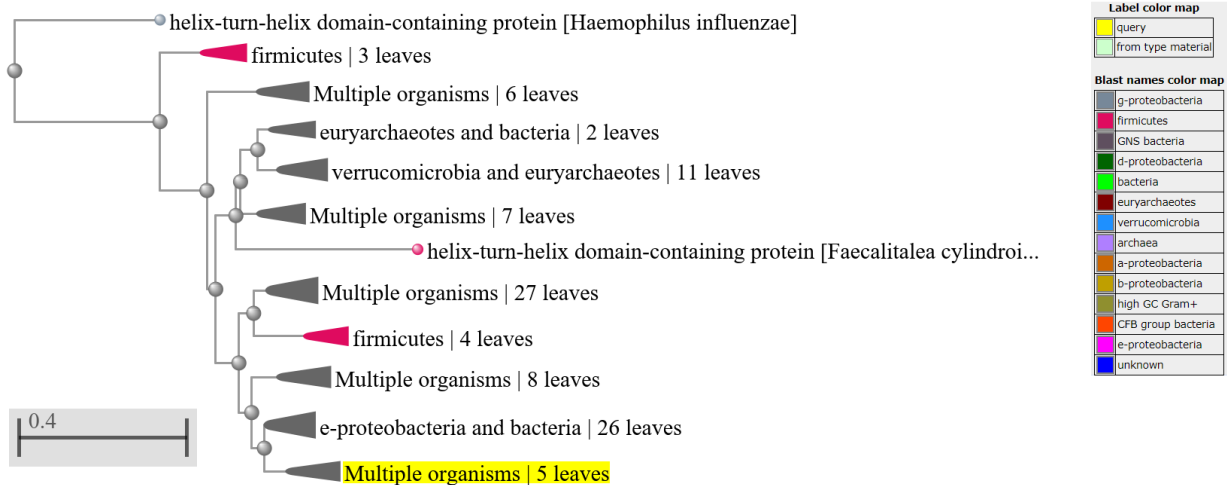

## 56- MESINF\_0559\_1204: Iron-containing alcohol dehydrogenase

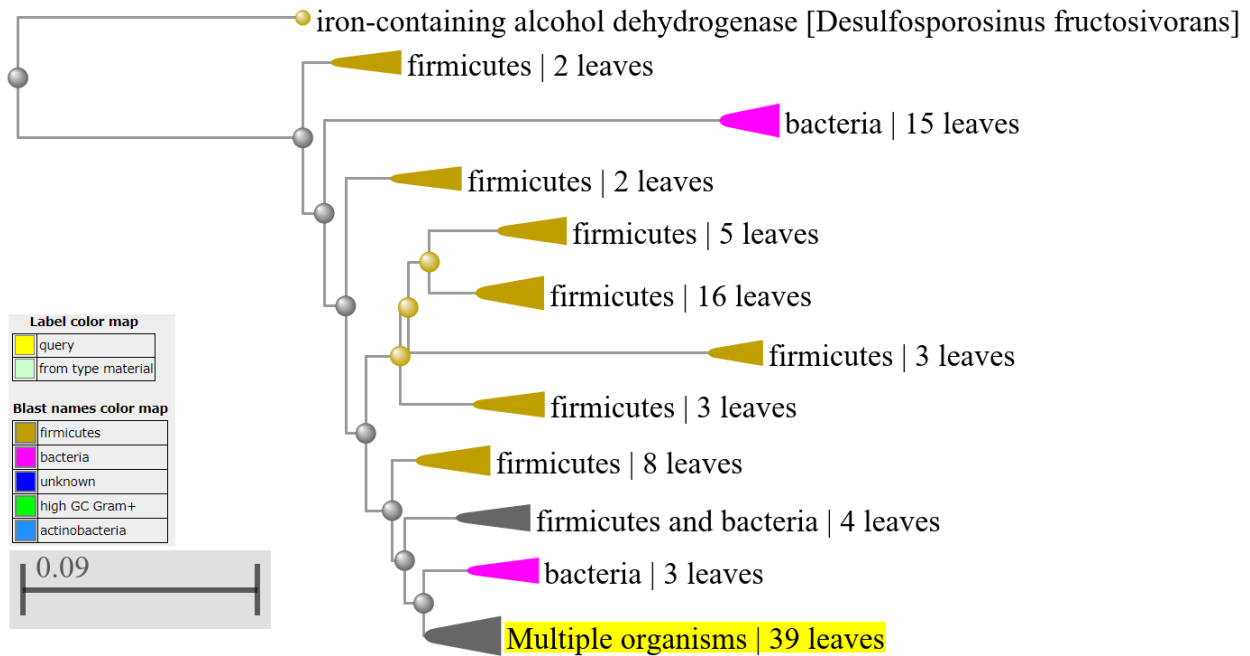

## 57- MESINF\_0559\_1870: Lyase/Listeria protein

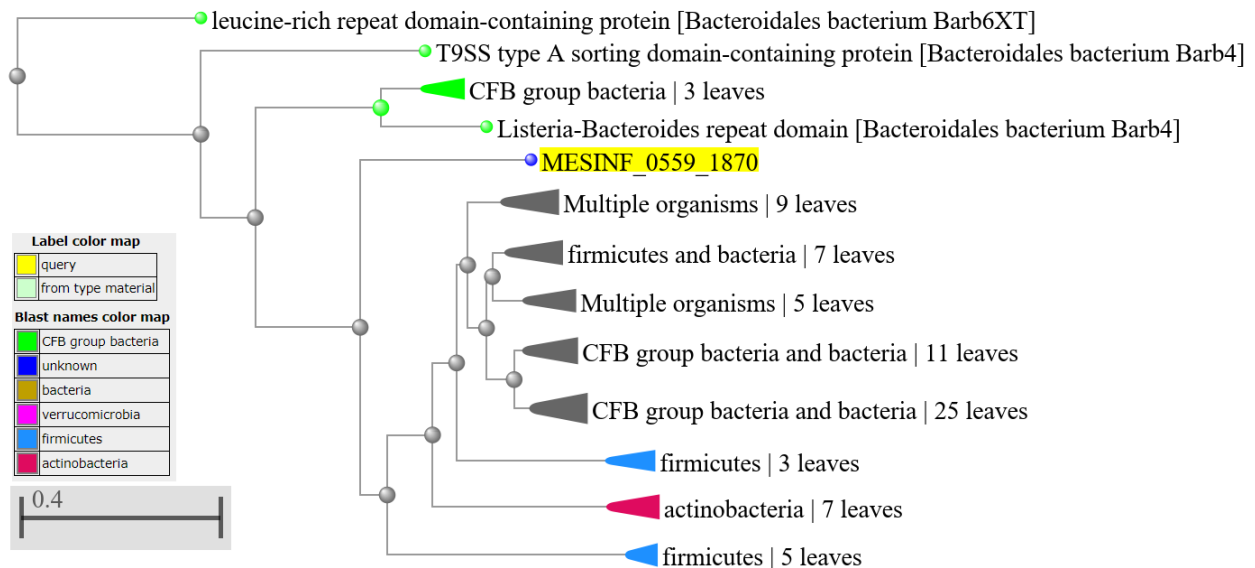

## 58- MESINF\_0559\_0698: Mechanosensitive ion channel MscS

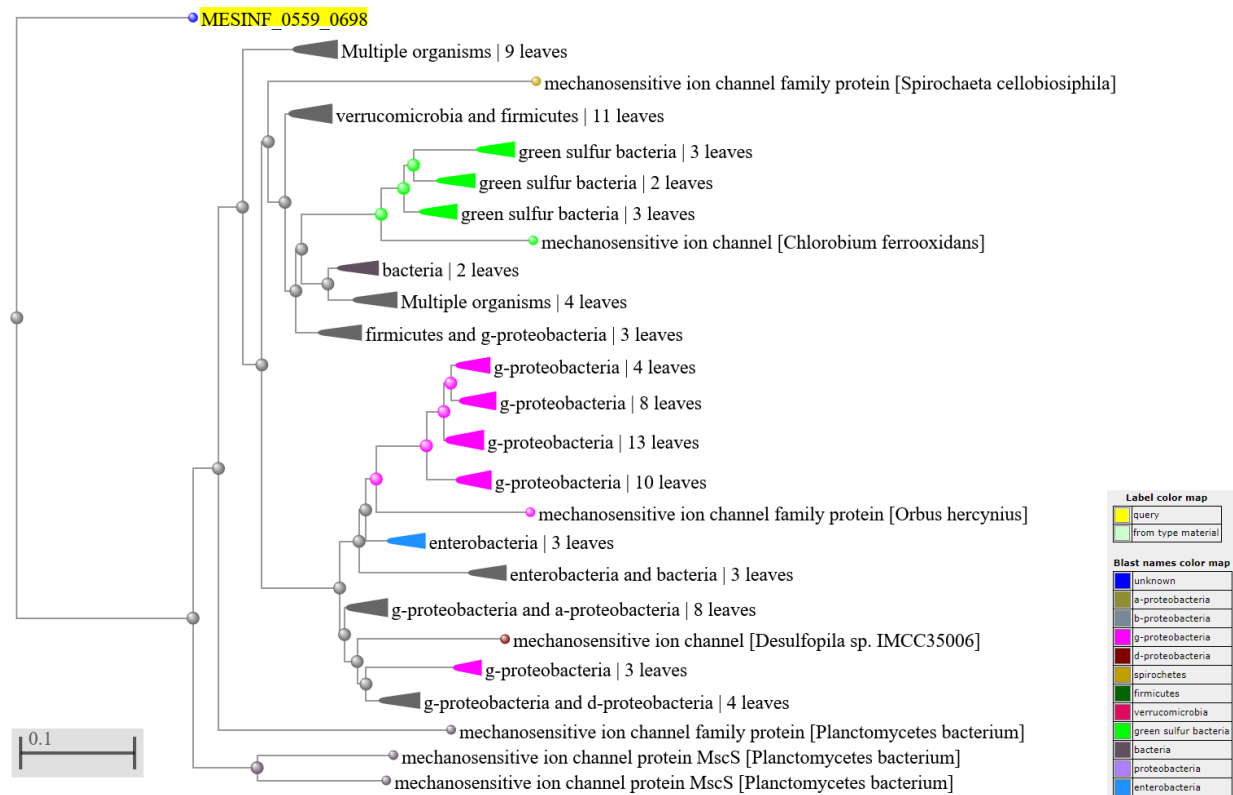

## 59- MESINF\_0559\_1607: OmpA family protein

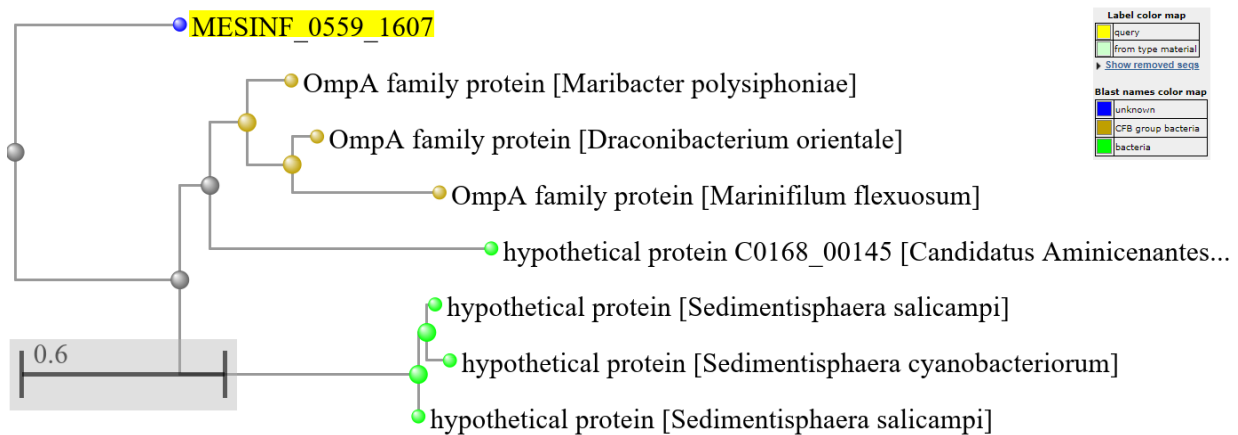

# 60- MESINF\_0559\_1333: Peptidase T

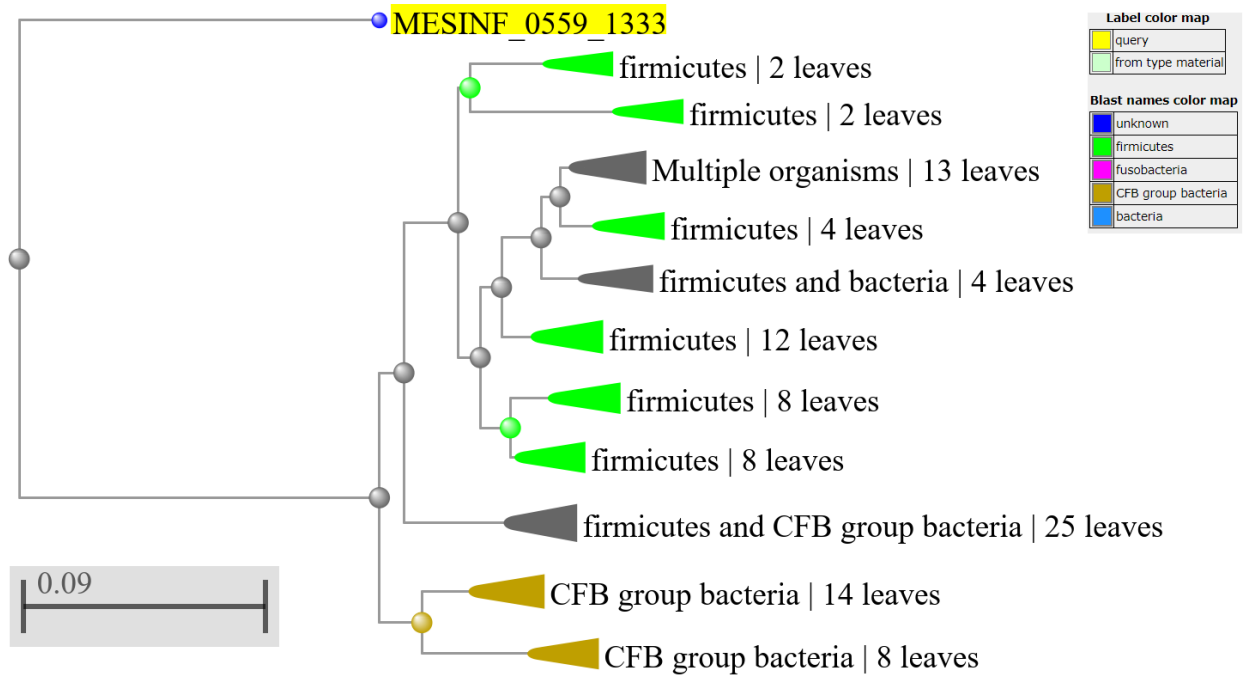

# 61- MESINF\_0559\_0677: reductase

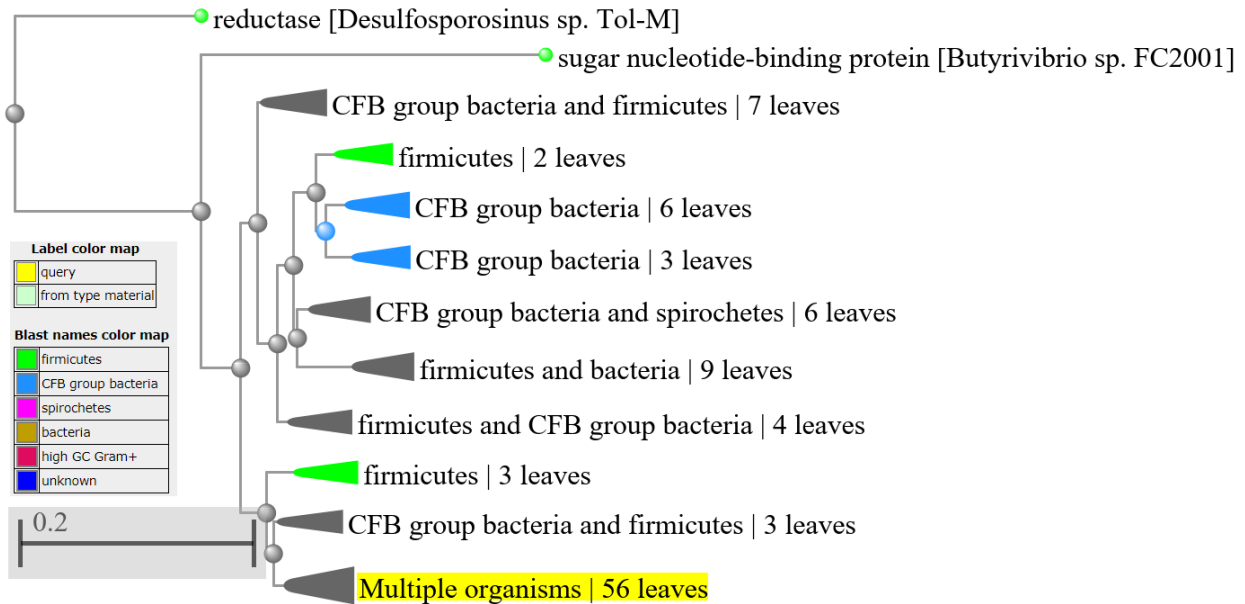

### 62- MESINF\_0559\_0718: SgcJ/Ecac family oxidoreductase

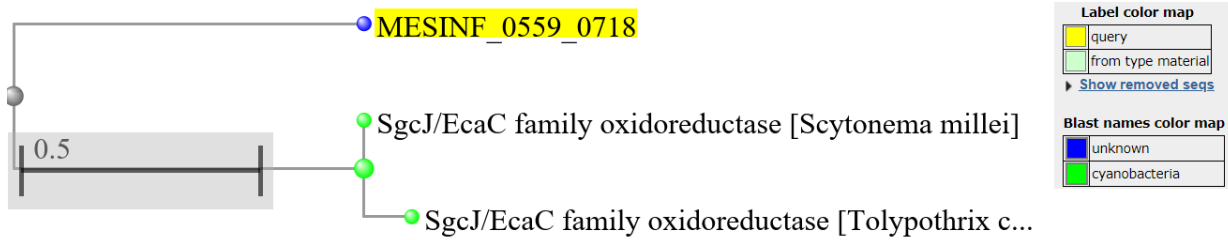

### 63- MESINF\_0559\_1236: Sulfite exporter TauE/SafE

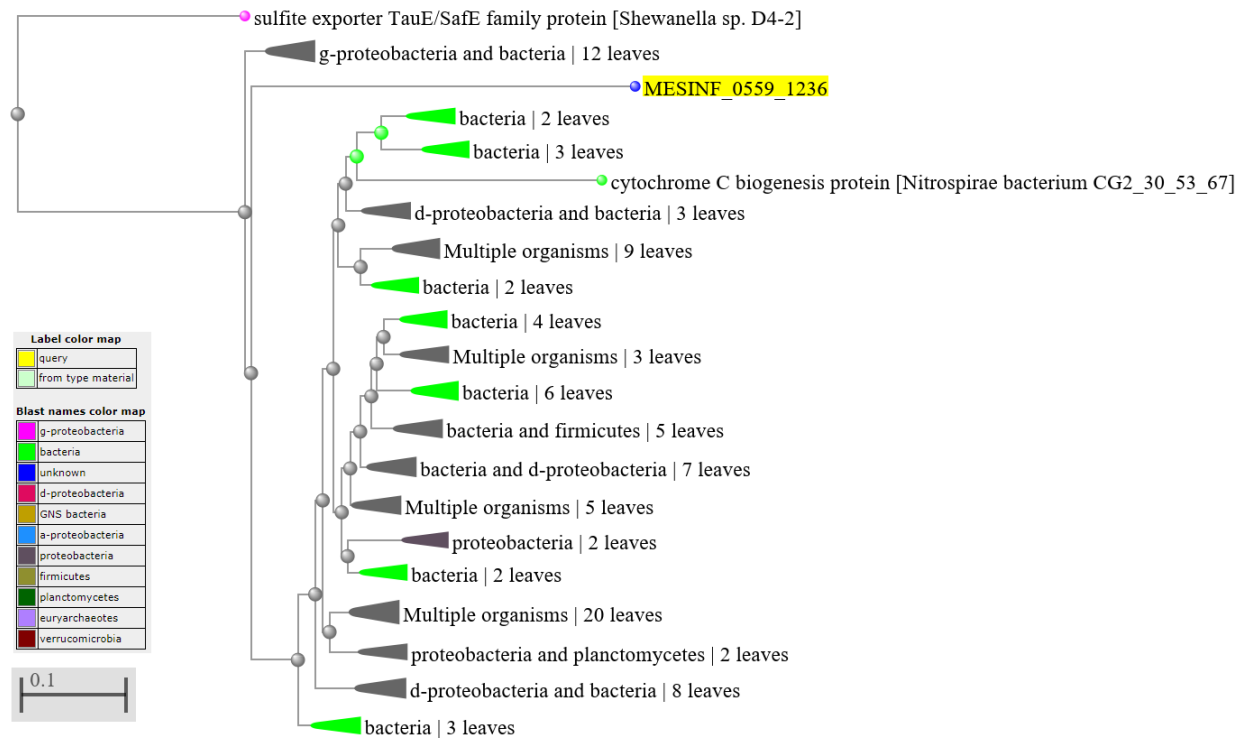

### 64- ESINF\_0559\_0429: Transient receptor potential cation channel

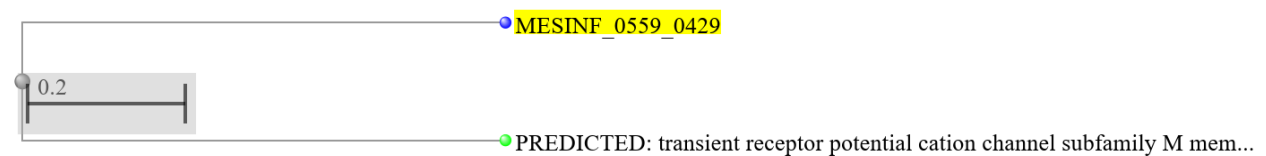

## 65- MESINF\_0559\_1290: twitching motility protein PilT

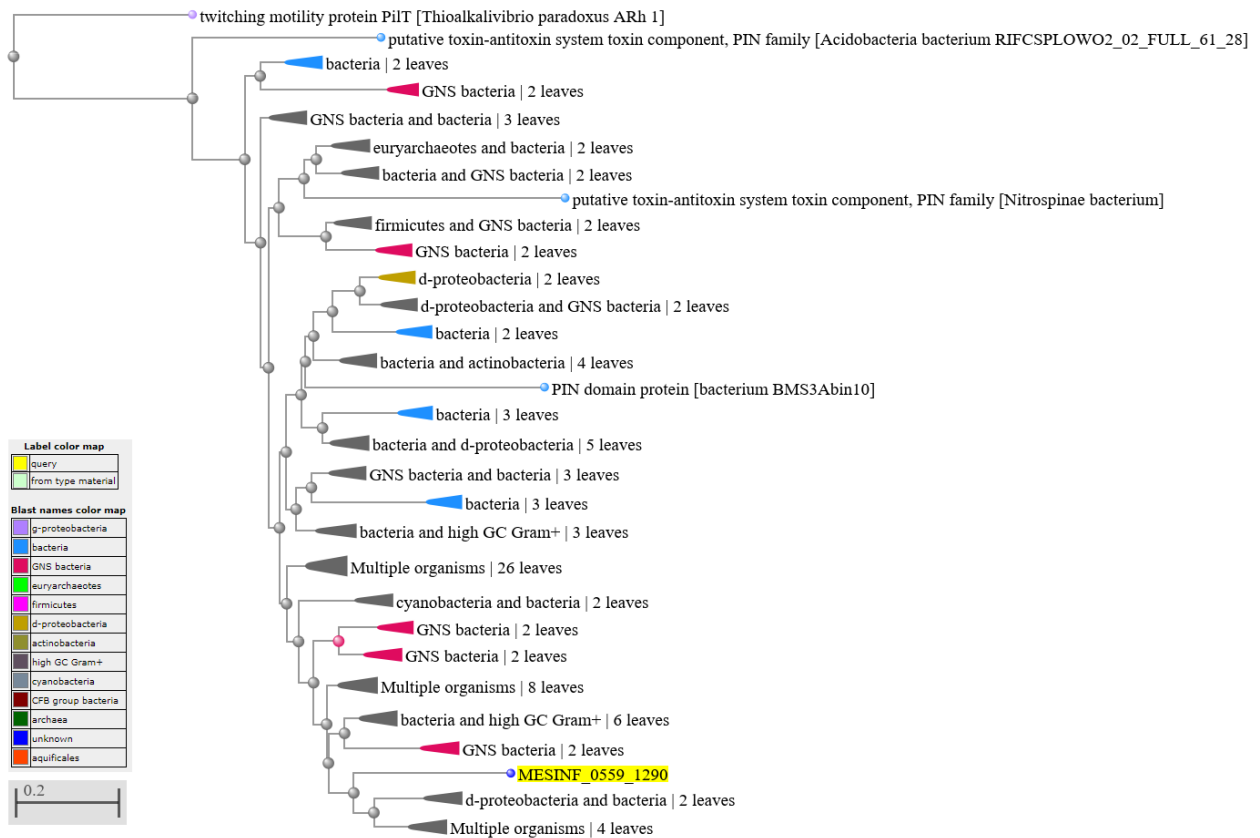

## 66- MESINF\_0559\_1129: WD40-repeat-containing domain

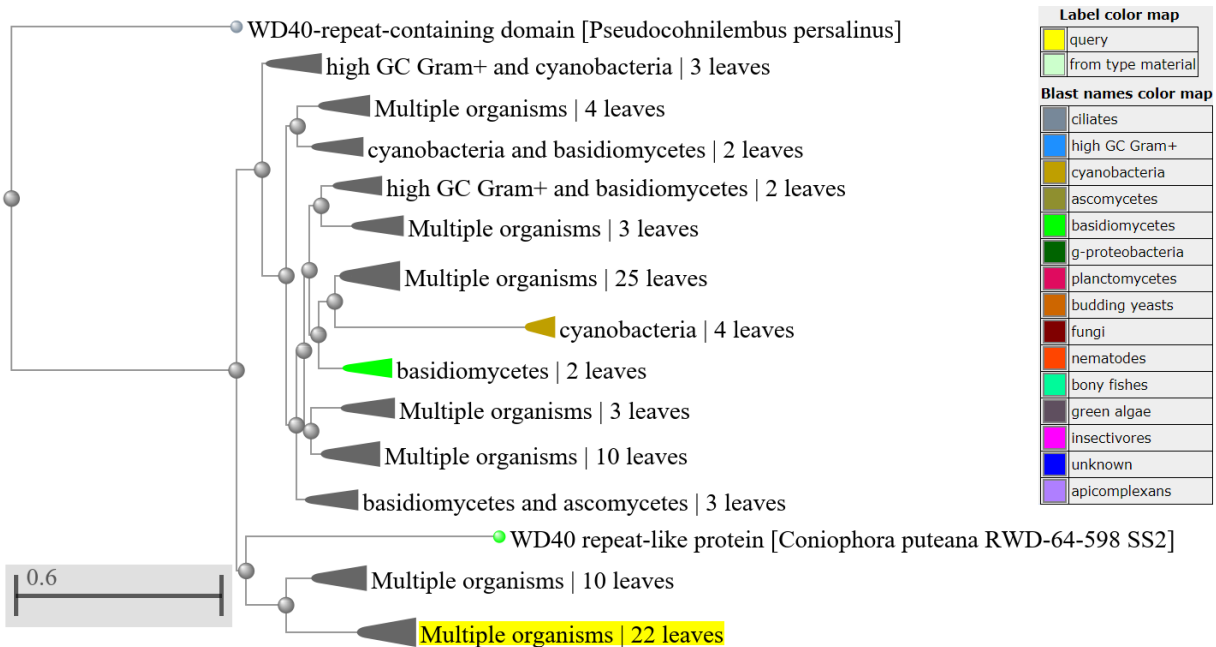

## 67- MESINF\_0559\_2062: ypfG - DUF1176 domain-containing protein

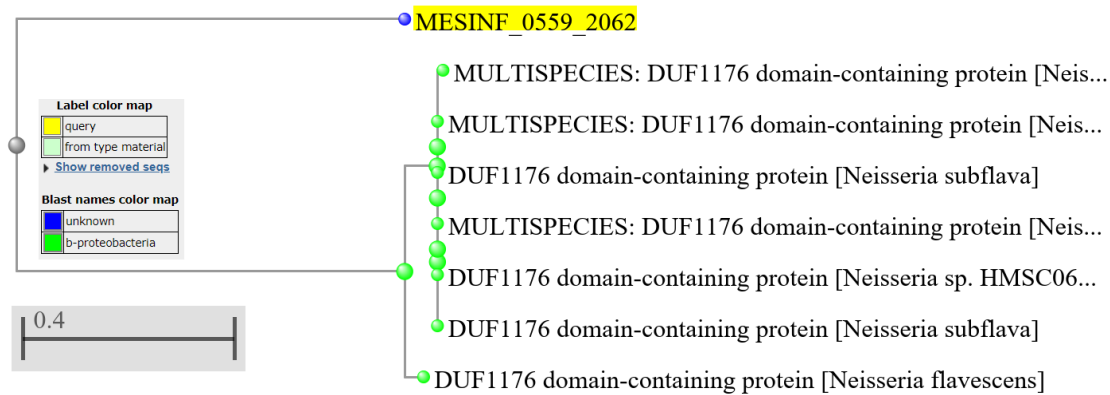

## 68- MESINF\_0559\_0867: Zinc ribbon domain containing

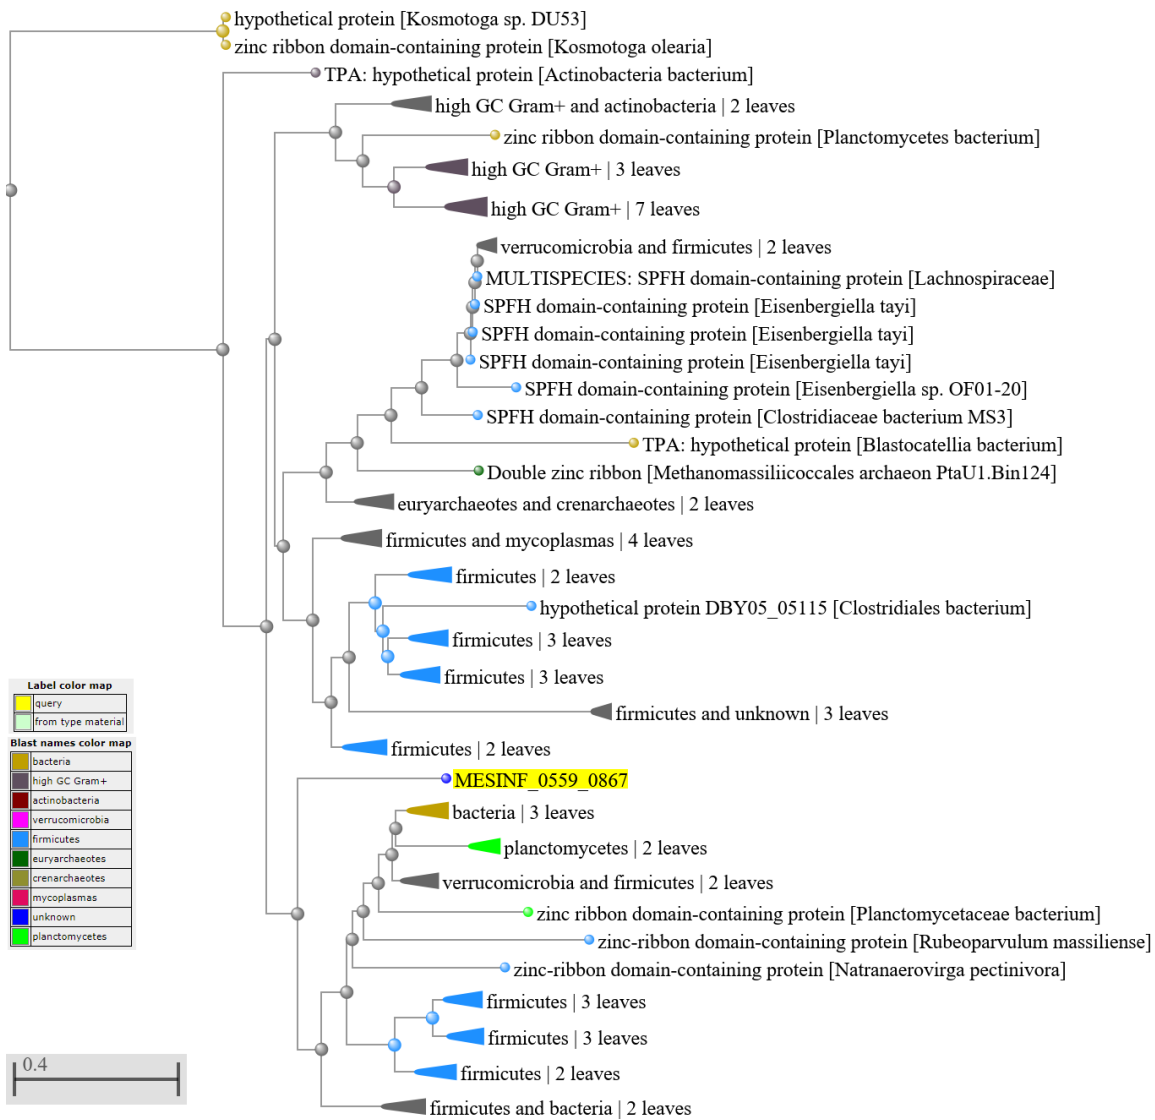

69- MESINF\_0559\_1102: DMT family transporter

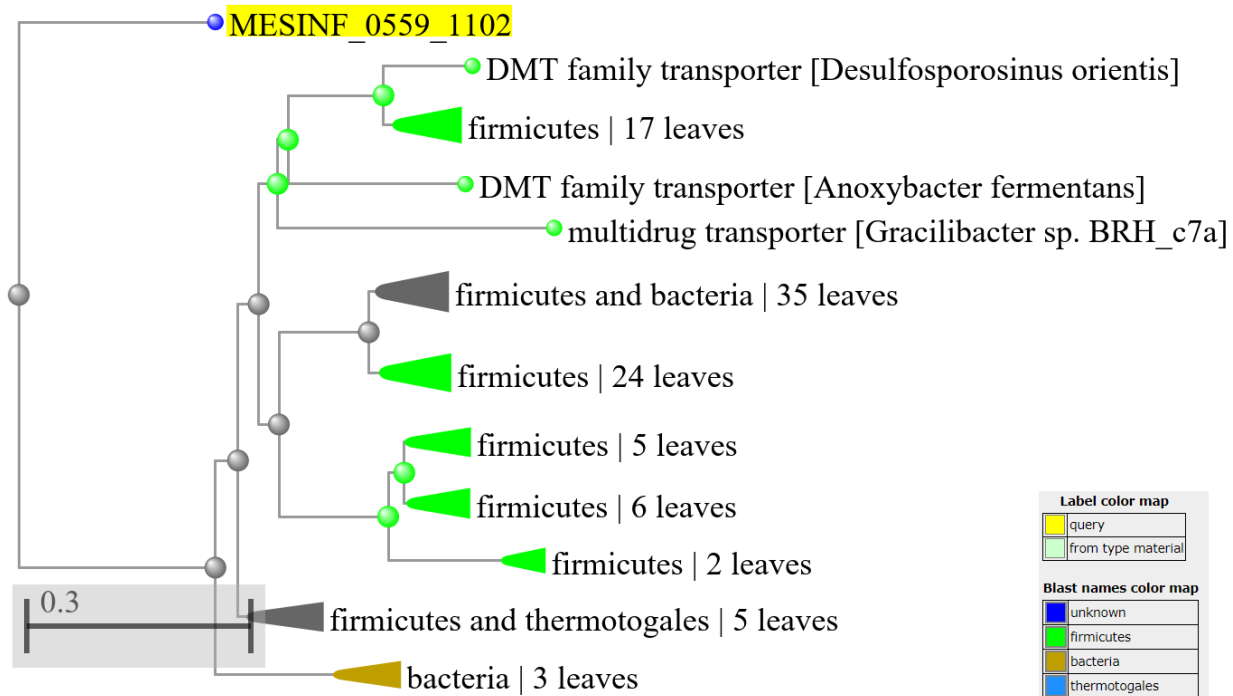

70- MESINF\_0559\_1259: Unknown

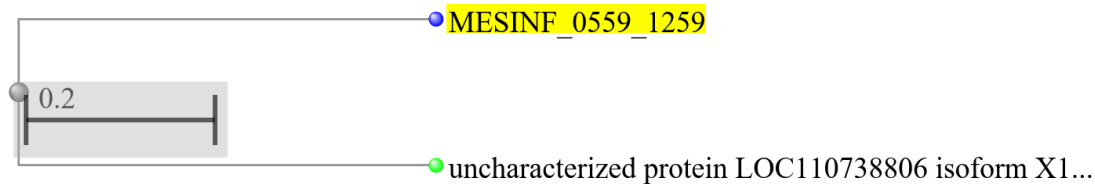

71- MESINF\_0559\_1324: Unknown

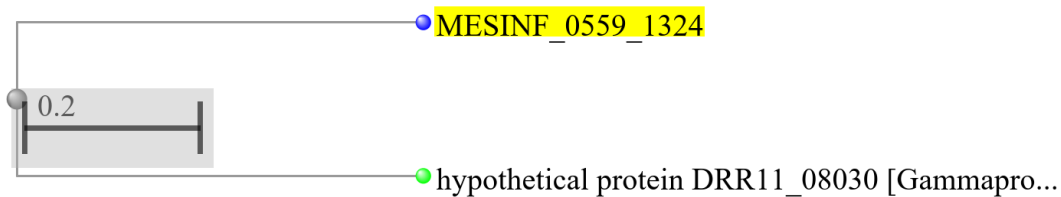

72- MESINF\_0559\_0454: Unknown

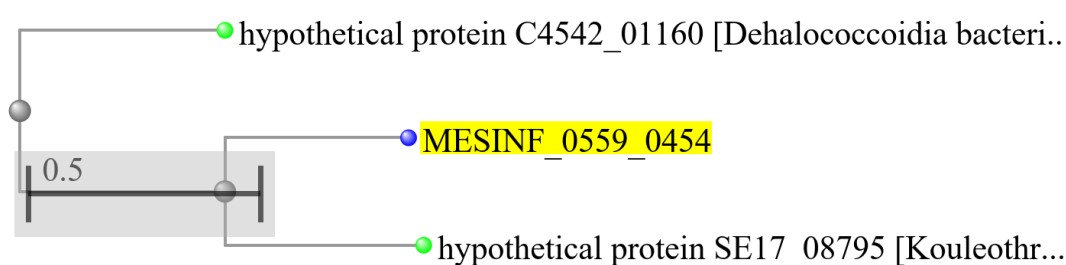

### 73- MESINF\_0559\_0528: Unknown

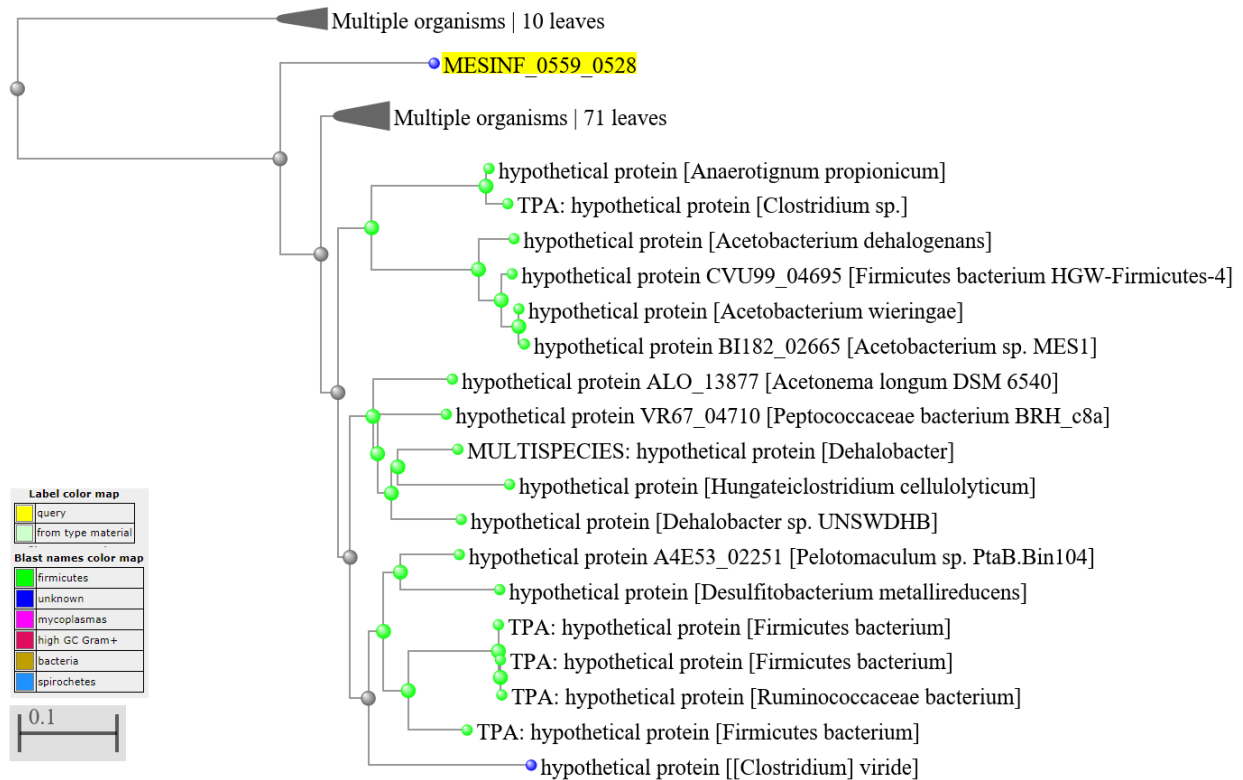

### 74- MESINF\_0559\_2759: Unknown

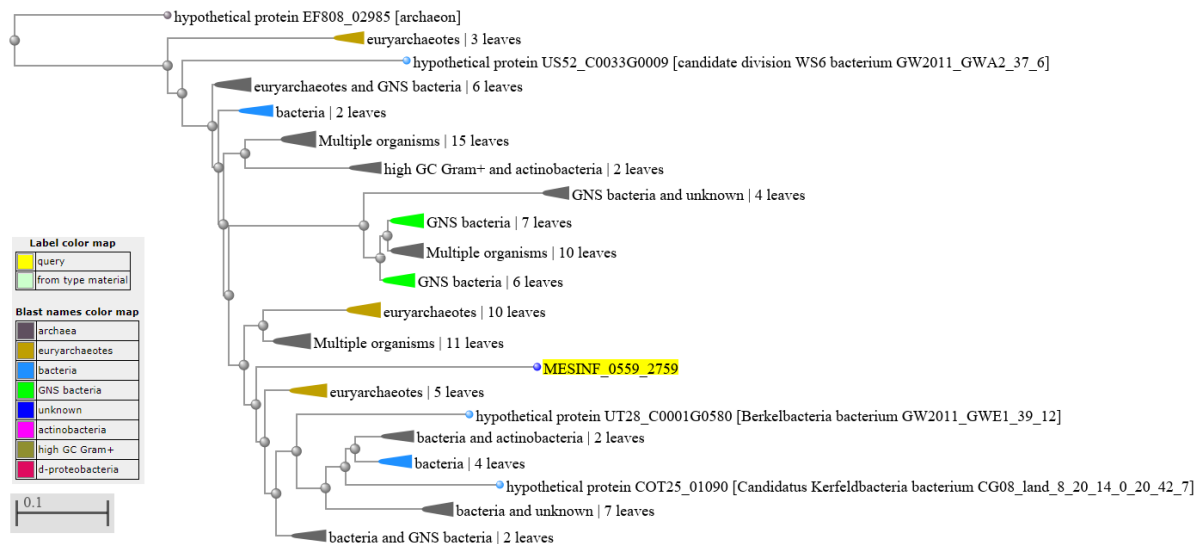

75- MESINF\_0559\_0553: Unknown

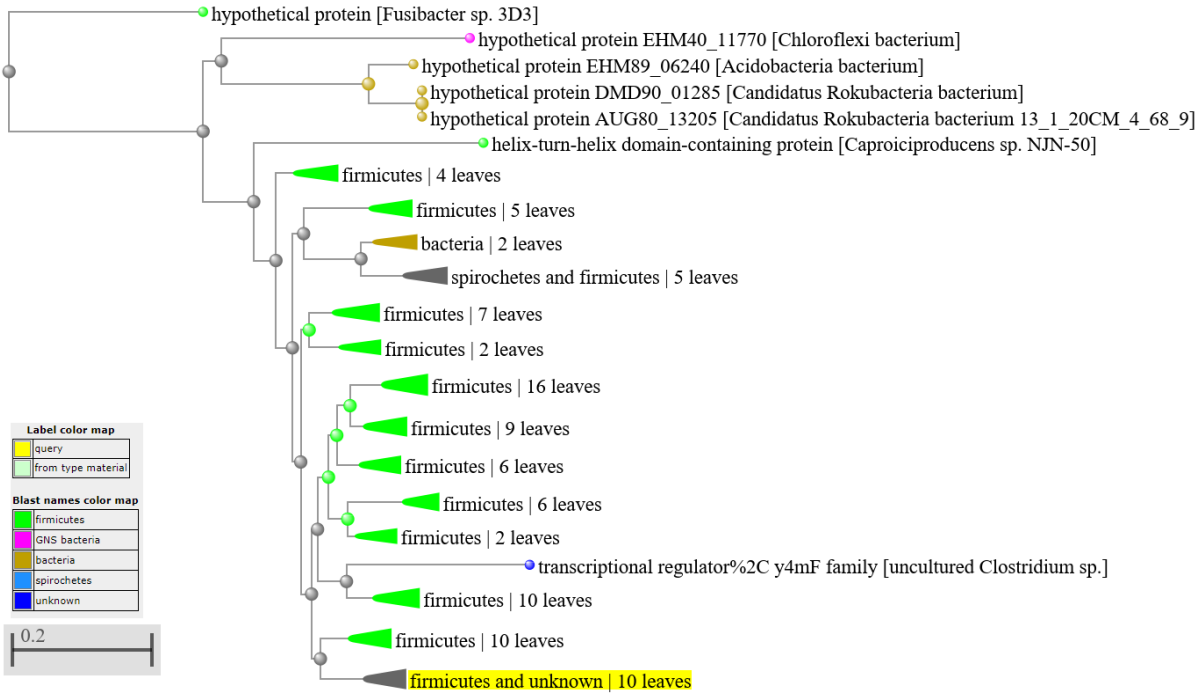

Supplement: s1 [file s1]
